# Supplementary material
Source: Research Square preprint supplement (doi:10.21203/rs.3.rs-8693656/v1)
Supplement: Supplementary file 1 [file 470f14083d6178c94e9b8328.xlsx]

## Sheet: palu
		Motivation
		% d’adultes qui acceptent faire vacciner leur enfant de moins de 5 ans contre le Paludisme
	Total (n=10.466)	95,6[94,5-96,5]
	Provinces
	Bas Uélé (n=483)	99,0[97,7-99,5]
	Équateur (n=369)	97,4[91,5-99,2]
	Haut Katanga (n=342)	92,1[85,0-96,0]
	Haut Lomami (n=492)	95,8[93,5-97,3]
	Haut Uélé (n=371)	99,6[98,6-99,9]
	Ituri (n=337)	93,0[83,8-97,2]
	Kongo Central (n=261)	88,1[79,3-93,5]
	Kasaï Oriental (n=386)	99,4[97,5-99,8]
	Kwango (n=376)	97,4[95,3-98,5]
	Kwilu (n=418)	98,5[97,1-99,3]
	Kinshasa (n=175)	85,6[76,9-91,5]
	Kasaï Central (n=361)	97,4[93,0-99,1]
	Kasai (n=359)	98,3[95,8-99,3]
	Lualaba (n=453)	92,8[87,1-96,1]
	Lomami (n=325)	99,2[95,0-99,9]
	Mai-Ndombe (n=401)	87,3[83,2-90,5]
	Mongala (n=460)	98,5[93,0-99,7]
	Maniema (n=493)	93,0[84,1-97,1]
	Nord Kivu (n=299)	89,3[83,4-93,3]
	Nord Ubangi (n=400)	96,7[91,3-98,8]
	Sud Kivu (n=377)	96,2[92,1-98,3]
	Sankuru (n=549)	97,8[95,8-98,9]
	Sud Ubangi (n=638)	99,7[98,5-100,0]
	Tanganyika (n=469)	97,6[94,6-98,9]
	Tshopo (n=331)	95,6[87,0-98,6]
	Tshuapa (n=541)	100

## Sheet: mpox
		Motivation
		% d’adultes qui acceptent de se faire vacciner contre la variole simienne « Mpox
	Total (n=17.999)	81,9[77,9-85,3]
	Nom de la la province
	Bas Uélé (n=861)	92,3[90,7-93,7]
	Équateur (n=625)	83,3[65,5-92,9]
	Haut Katanga (n=580)	74,0[64,6-81,5]
	Haut Lomami (n=762)	59,0[38,3-76,9]
	Haut Uélé (n=654)	90,1[86,2-92,9]
	Ituri (n=586)	67,1[40,2-86,0]
	Kongo Central (n=651)	84,2[72,9-91,3]
	Kasaï Oriental (n=686)	96,3[94,4-97,6]
	Kwango (n=655)	88,0[83,5-91,3]
	Kwilu (n=833)	95,5[92,7-97,3]
	Kinshasa (n=508)	65,0[58,3-71,1]
	Kasaï Central (n=626)	86,3[77,6-92,0]
	Kasai (n=598)	92,4[85,5-96,1]
	Lualaba (n=847)	75,6[63,6-84,5]
	Lomami (n=529)	98,7[96,8-99,5]
	Mai-Ndombe (n=658)	86,7[82,6-90,0]
	Mongala (n=682)	92,1[81,5-96,8]
	Maniema (n=727)	82,8[64,4-92,7]
	Nord Kivu (n=578)	50,5[34,5-66,5]
	Nord Ubangi (n=580)	91,2[76,9-97,0]
	Sud Kivu (n=703)	83,1[69,1-91,5]
	Sankuru (n=884)	90,4[86,5-93,2]
	Sud Ubangi (n=981)	95,5[92,0-97,5]
	Tanganyika (n=772)	90,0[86,2-92,9]
	Tshopo (n=624)	91,4[81,7-96,2]
	Tshuapa (n=809)	98,9[97,0-99,6]

## Sheet: hpv papilomavirus
		% d’adultes qui acceptent de se faire vacciner leur fille contre le cancer du col utérin
	Total (n=7.565)	84,3[81,0-87,1]
	Nom de la province
	Bas (n=311)	84,1[69,7-92,4]
	Équateur (n=220)	86,7[77,2-92,7]
	Haut Katanga (n=220)	83,3[73,9-89,8]
	Haut Lomami (n=357)	86,1[74,5-92,9]
	Haut Uélé (n=192)	91,2[85,1-95,0]
	Ituri (n=222)	75,0[47,2-90,9]
	Kongo Central (n=179)	82,1[66,8-91,3]
	Kasaï Oriental (n=369)	97,3[94,6-98,7]
	Kwango (n=252)	87,3[82,4-90,9]
	Kwilu (n=304)	91,3[84,0-95,5]
	Kinshasa (n=101)	72,1[62,8-79,8]
	Kasaï Central (n=291)	91,9[84,0-96,1]
	Kasaï (n=312)	87,9[77,7-93,8]
	Lualaba (n=371)	82,8[70,1-90,8]
	Lomami (n=195)	98,5[93,1-99,7]
	Mai-Ndombe (n=307)	87,2[82,5-90,9]
	Mongala (n=353)	73,2[59,4-83,6]
	Maniema (n=373)	84,5[73,4-91,6]
	Nord Kivu (n=247)	52,2[36,3-67,7]
	Nord Ubangi (n=261)	91,5[79,0-96,9]
	Sud Kivu (n=232)	85,7[74,6-92,4]
	Sankuru (n=391)	90,8[85,5-94,3]
	Sud Ubangi (n=538)	86,3[79,4-91,1]
	Tanganyika (n=293)	82,7[72,2-89,8]
	Tshopo (n=264)	92,2[80,6-97,1]
	Tshuapa (n=410)	96,9[93,7-98,5]
