# Supplementary material
Source: Research Square preprint supplement (doi:10.21203/rs.3.rs-8693656/v1)
Supplement: Supplementary file 2 [file ec6a44f9b060c5453e282e4c.xlsx]

## Sheet:  survey
kind	name	relevant	label	hint	constrained	constraint_message	required	appearance	default	calculation	choice_filter	read_only	repeat_count	save_instance	save_form	picture
start	start
end	end
deviceid	deviceid
imei	imei		Tablet IMEI
today	today
geopoint	geo_auto		Automatic geolocation					background
note	intronote		¤¤¤¤¤¤¤¤¤¤¤¤¤¤ WELCOME ¤¤¤¤¤¤¤¤¤¤¤¤¤ You are on the data collection form for the VACCINATION COVERAGE SURVEY IN 26 PROVINCES OF THE DRC	Swipe your finger across the screen to begin collecting.											Logo_KSPH.png
note	note1		001 HOUSEHOLD QUESTIONNAIRE ECV_COVID19
note	note1b		MODULE 1: HOUSEHOLD IDENTIFICATION
select_one yesno	q100		Is this a replacement health area?	If so, please select the last two health areas from the list of health areas that will appear below.			yes
select_one pvc	q101		Name of the province				yes
select_one zs_list	q103		Health zone name				yes				q101=${q101}
select_one as_list	q105		Cluster name (of the Health Area)	This list contains the selected health areas, and the last two on the list are the replacement health areas.			yes				q103=${q103}
select_one seg_list	q115		The segment number				yes
integer	q106		Avenue/Street/Village ID Number*	Start by listing the avenues/streets/villages in the segment and then choose the order number.			yes
text	q107		Avenue/Street/Village Name/Number	Please enter in uppercase and avoid special characters	regex(., '^[AZ ]{1,90}+$')	Please enter only uppercase letters and spaces.	yes
select_one milieu_list	q108		Household location environment				yes
text	q110		Investigator's name	Please enter in uppercase and avoid special characters	regex(., '^[AZ ]{1,90}+$')	Please enter only uppercase letters and spaces.	yes
text	q112		Name of the field supervisor	Please enter in uppercase and avoid special characters	regex(., '^[AZ ]{1,90}+$')	Please enter only uppercase letters and spaces.	yes
select_one supool_list	q112a		Name of the provincial supervisor	Select the name of your provincial supervisor			yes
text	q113		Household ID number	Copy the number onto the household parcel survey (survey number).			yes
text	q114		Name of head of family / household	Investigator: Please enter the full names of the head of household (Last Name + Middle Name + First Name) in capital letters and without special characters.	regex(., '^[AZ ]{1,90}+$')	Please enter only uppercase letters and spaces.	yes
note	consentec		Hello, my name is ${q110}. I work for the Ministry of Public Health, Hygiene, and Social Welfare. We are currently surveying adults aged 18 and over in this area about COVID-19 vaccination status to determine the proportion of individuals who are protected and to understand why some are not vaccinated. We would like to ask you questions about the characteristics of your household and the characte…	INTERVIEWER: READ THE CONSENT TO THE SURVEY. A copy of this document must be given to the participant. If the interviewee has already been interviewed, they must not be interviewed again. Tell them that you cannot interview them a second time. Thank them and end the interview. If they have not been interviewed before, continue the interview.
select_one yesno	accepted		Do you agree to participate in the study?				yes
select_one yesno	consent	${accepte}='1'	Can we begin now?				yes
begin group	debutint	${consent}='1' or ${accepte}='1'	Interview begins
begin group	gpdate		.					field-list
date	q117		Date the interview began during the visit				yes	no-calendar		today()
time	q118		Interview start time during the visit				yes			${start}
dateTime	q118a		t1a				yes	background		now()
end group	gpdate
text	q127		Respondent's name		regex(., '^[AZ ]{1,90}+$')	Please enter only uppercase letters and spaces.	yes
note	note2b		MODULE 2: HOUSEHOLD CHARACTERISTICS
select_one sex_list	qa201		QA201 Gender of head of household (${q114})				yes
select_one etc_list	qa202		QA202 What is the current marital status of the head of household (${q114})?				yes
begin group	note3va		QA203 On what day, month and year was the head of household born (${q114})?					table-list
integer	qa203_day		DAY	Insert 15 if the day is unknown or if there are no answers.	.<=31		yes
integer	qa203_month		MONTH :	Insert 6 if the month is unknown and if there are no answers	.<=12	Please check the month.	yes
integer	qa203_year		YEAR :	Investigator, please ask the respondent to estimate the year, taking historical events into account.	(<= 2006 and >= 1930)	Please check the year.	yes
end group	note3va
calculate	cal_age2									2024-${qa203_annee}
integer	qa204		QA204 How old is the head of household currently (${q114})?	Age refers to the year of birth or the vintage, not completed age. Interviewer, if the respondent doesn't know, please ask them to estimate the year, taking historical events into account.	(<=99 and >=18)	Sorry, the age cannot be less than 18 or more than 100.	yes
note	note_ag2	${cal_age2}!=${qa204}	The age entered does not correspond to the year of birth. It should be ${cal_age2}. Please check.	Go back to the previous questions QA203 and QA204 and correct them!			yes
select_one q303_list	q204b		Q204b. What age group do you belong to?	Only ask the question if the respondent refuses to give you their exact age.		Sorry, the age cannot be less than 12 or more than 100.	yes
select_one niv_list	qa205		QA205 What is the highest level of education attained by the head of household (${q114})?	The investigator will ask the preliminary question of whether the head of household attended school. Circle one answer.			yes
select_one q306_list	qa206		QA206 What is the occupation of the head of household (${q114})?				yes
text	qa206_other	${qa206}='14'	QA206 Other (to be specified)		regex(., '^[AZ ]{1,90}+$')	Please enter only uppercase letters and spaces.	yes
select_one rel_list	qa207		QA207 What is the current religion of the head of household (${q114})?				yes
text	qa207_other	${qa207}='7'	QA207 Other (please specify)	Please enter in uppercase and avoid special characters	regex(., '^[AZ ]{1,90}+$')	Please enter only uppercase letters and spaces.	yes
select_one qa208_list	qa208		QA208 What is the ethnicity of the head of household (${q114})?				yes
begin group	debutqa209		Household goods					field-list
note	noteqa209		QA209. We are going to ask you some questions about the assets your household owns in order to determine your socioeconomic status and understand what can influence a person's vaccination status. Does this household include:
select_one yesno	qa209_label		Household appliances					label
select_one yesno	qa209a		A functional television				yes	list-nolabel
select_one yesno	qa209b		A working radio				yes	list-nolabel
select_one yesno	qa209c		A functional refrigerator/freezer				yes	list-nolabel
end group	debutqa209
begin group	debutqa210		Household goods suite					field-list
note	noteqa210		QA210. Does a member of your household own:
select_one yesno	qa210_label		Painting					label
select_one yesno	qa210a		A wristwatch				yes	list-nolabel
select_one yesno	qa210b		A bicycle				yes	list-nolabel
select_one yesno	qa210c		A motorcycle				yes	list-nolabel
select_one yesno	qa210d		A car, a truck or a van				yes	list-nolabel
select_one yesno	qa210e		cart with animal				yes	list-nolabel
select_one yesno	qa210f		Boat / Whaler				yes	list-nolabel
select_one yesno	qa210g		canoe				yes	list-nolabel
select_one yesno	qa210h		dugout canoe with motor				yes	list-nolabel
end group	debutqa210
select_one yesno	qa211		QA211 Does any member of this household have a computer?				yes
select_one yesno	qa212		QA212 Does any member of this household have a mobile phone?				yes
select_one yesno	qa213		QA213 Do you have internet access at home?				yes
select_one loge_list	qa214		QA214 Do you or someone else living in this household own this dwelling?				yes
text	qa214_other	${qa214}='6'	QA214 Other (please specify)	Please enter in uppercase and avoid special characters	regex(., '^[AZ ]{1,90}+$')	Please enter only uppercase letters and spaces.
select_one bank_list	qa215		QA215 Does any member of this household have a bank account?				yes
select_one yesno	qa216		QA216 Are you covered by health insurance?				yes
select_multiple assu_list	qa217	${qa216}='1'	QA217 What types of health insurance are you covered by?	The investigator does not suggest answers; several answers are possible.			yes
text	qa217_other	selected(${qa217},'8')	QA217 Other (please specify)	Please enter in uppercase and avoid special characters	regex(., '^[AZ ]{1,90}+$')	Please enter only uppercase letters and spaces.	yes
select_one yesno	qa218		QA218. Does your household own land?				yes
integer	qa219	${qa218}='1'	QA219 If yes, how many square meters does it have?	Enter -999 if not known. However, estimate by multiplying the length by the width	.> 0 or .=-999		yes
select_one yesno	qa220		QA220 Does your household own livestock?				yes
begin group	possession	${qa220}='1'	QA221.If yes, for each of the following livestock, state how many the household owns.				yes	field-list
integer	cattle		Cattle (cows, oxen)				yes
integer	sheep		Sheep/goats				yes
integer	pigs		Pigs				yes
integer	poultry		Poultry				yes
integer	otherbet		Other livestock to be specified				yes
end group	possession
integer	qa222		QA222 Total number of household members?				yes
integer	qa223		QA223 Number of adults (18 years and over) in the household?		${qa223} <= ${qa222}		yes
integer	qa224		QA224 Number of adults aged 55 and over?		${qa224} <=${qa223}		yes
integer	qa226		Q226 How many adults (18 years and older) are present in this household today?	Investigator: Confirm the number of adults present			yes
begin repeat	adult		Adult registration										${qa226}
calculate	adult_index									position(..)
note	note3		Information about the respondent (looped depending on the number of adults present)
note	consent		Hello, my name is ${q110}. I work for the Ministry of Public Health, Hygiene, and Social Welfare. We are currently surveying adults aged 18 and over in this area about COVID-19 vaccination status to determine the proportion of individuals who are protected and to understand why some are not vaccinated. We would like to ask you questions about the characteristics of your household and the characte…	INTERVIEWER: READ THE CONSENT TO THE SURVEY. A copy of this document must be given to the participant. If the interviewee has already been interviewed, they must not be interviewed again. Tell them that you cannot interview them a second time. Thank them and end the interview. If they have not been interviewed before, continue the interview.
select_one yesno	accepts_adult		Do you agree to participate in the study?				yes
select_one yesno	consent_adult	${accepte_adult}='1'	Can we begin now?				yes
begin group	gpesec3a	${consent_adult}=1	Module 3: SOCIO-DEMOGRAPHIC CHARACTERISTICS
select_one q300_list	q300		Q300. What is the respondent's gender?				yes
begin group	note301		Q301. What is your date of birth?					table-list
integer	q301_day		Day	Insert 15 if the day is unknown or if there are no answers.	.<=31		yes
integer	q301_month		Month	Insert 6 if the month is unknown and if there are no answers	.<=12	Please check the month.	yes
integer	q301_year		Year	Investigator, please ask the respondent to estimate the year, taking historical events into account.	(<= 2006 and >= 1930)	Please check the year.	yes
end group	note301
calculate	cal_age									2024-${q301_year}
integer	q302		Q302. How old are you?	(age in completed years)			yes
note	note_age	${cal_age}!=${q302}	The age entered does not correspond to the year of birth. It should be ${cal_age2}. Please check.	Go back to the previous questions Q301 and Q302 and correct them!			yes
select_one q303_list	q303		Q303. What age group do you belong to?	Only ask the question if the respondent refuses to give you their exact age.		Sorry, the age cannot be less than 12 or more than 100.	yes
select_one niv_list	q304		Q304. What is your level of education?				yes
text	q304_other	${q304}='7'	Specify		regex(., '^[AZ ]{1,90}+$')	Please enter only uppercase letters and spaces.	yes
select_one etc_list	q305	q305	Q305. What is your current marital status?				yes
select_one q306_list	q306		Q306. What is your profession?				yes
text	q306_other	${q306}='14'	Specify				yes
select_one yesno	q306b		Q306b. Are you a healthcare provider?				yes
select_one q307_list	q307		Q307. Which of the following statements describes your current professional situation?	Would you say...			yes
text	q307_other	${q307}='10'	Specify		regex(., '^[AZ ]{1,90}+$')	Please enter only uppercase letters and spaces.	yes
select_one yesno	q308		Q308. Do you have any children under the age of 5?				yes
select_one yesno	q309		Q309. Do you have a daughter under 15 years of age in your care?				yes
begin group	group_vacpalu	${q308}=1	malaria vaccine
note	vape		Module 5. Malaria Vaccination (VAP)
select_one yesno	vap1		Qvap1. Have you heard of malaria?				yes
select_one problem	vap2		Qvap2. In your opinion, to what extent is malaria a public health problem in your community?				yes
select_one yesnonsp	vap3		Qvap3. Has one of your children or relatives (under 5 years old) suffered from malaria in the last six months?				yes
select_one confidence	vap4		Qvap4. Would you trust a new malaria vaccine if it were offered today to protect a child?				yes
text	vap4_reasons	${vap4}=1	If NOT AT ALL CONFIDENT, what are the reasons?		regex(., '^[AZ ]{1,90}+$')	Please enter only uppercase letters and spaces.	yes
select_one yesnonsp	vap5		Qvap5. If a malaria vaccine were offered to your child, would you have them vaccinated?				yes
text	vap5_reasons	${vap5}=2	If NO, what are the reasons?		regex(., '^[AZ ]{1,90}+$')	Please enter only uppercase letters and spaces.	yes
select_one yesnonsp	vap6		Qvap6. Once the malaria vaccine is available, would you recommend it to other eligible people?				yes
text	vap6_reasons	${vap6}=2	If NO, what are the reasons?		regex(., '^[AZ ]{1,90}+$')	Please enter only uppercase letters and spaces.	yes
select_one place	vap7		Qvap7. Where would you prefer your child to be vaccinated against malaria?				yes
text	vap7_reasons	${vap7}=3	Other things to specify		regex(., '^[AZ ]{1,90}+$')	Please enter only uppercase letters and spaces.	yes
select_one yesnonsp	vap8		Qvap8. Do you think most of your relatives would want you to vaccinate your child against malaria?				yes
text	vap8_reasons	${vap8}=2	If NO, what are the reasons?		regex(., '^[AZ ]{1,90}+$')	Please enter only uppercase letters and spaces.	yes
select_one yesnonsp	vap9		Qvap9. Do you think your community or religious leaders would want you to vaccinate your child against malaria?				yes
text	vap9_reasons	${vap9}=2	If NO, what are the reasons?		regex(., '^[AZ ]{1,90}+$')	Please enter only uppercase letters and spaces.	yes
select_one yesnonsp	vap10		Qvap10. Do you trust the health workers who would vaccinate your child against malaria?				yes
text	vap10_reasons	${vap10}=2	If NO, what are the reasons?		regex(., '^[AZ ]{1,90}+$')	Please enter only uppercase letters and spaces.	yes
select_one yesno	vap11		Qvap11. Have you seen or heard any negative rumors about malaria vaccines?				yes
text	vap11_reasons	${vap11}=1	If YES, please explain.		regex(., '^[AZ ]{1,90}+$')	Please enter only uppercase letters and spaces.	yes
end group	group_vacpalu
begin group	group_vachpv	${q309}=1	HPV vaccine
note	HPV		Module 6. Cervical cancer vaccination (HPV)
select_one yesno	vhpv1		Qvhpv1. Have you heard of cervical cancer?				yes
select_one problem	vhpv2		Qvhpv2. In your opinion, to what extent is cervical cancer a public health problem in your community?				yes
select_one confidence	vhpv4		Qvhpv4. Would you trust a new cervical cancer vaccine if it were offered today to protect your daughter?				yes
text	vhpv4_reasons	${vhpv4}=1	If NOT AT ALL CONFIDENT, what are the reasons?		regex(., '^[AZ ]{1,90}+$')	Please enter only uppercase letters and spaces.	yes
select_one yesnonsp	vhpv5		Qvhpv5. If a vaccine against cervical cancer were offered to your daughter, would you have her vaccinated?				yes
text	vhpv5_reasons	${vhpv5}=2	If NO, what are the reasons?		regex(., '^[AZ ]{1,90}+$')	Please enter only uppercase letters and spaces.	yes
select_one yesnonsp	vhpv6		Qvhpv6. Once the cervical cancer vaccine is available, would you recommend it to other eligible individuals?				yes
text	vhpv6_reasons	${vhpv6}=2	If NO, what are the reasons?		regex(., '^[AZ ]{1,90}+$')	Please enter only uppercase letters and spaces.	yes
select_one place	vhpv7		Qvhpv7. Where would you prefer your daughter to be vaccinated against cervical cancer?				yes
text	vhpv7_reasons	${vhpv7}=3	Other things to specify		regex(., '^[AZ ]{1,90}+$')	Please enter only uppercase letters and spaces.	yes
select_one yesnonsp	vhpv8		Qvhpv8. Do you think most of your relatives would want you to vaccinate your daughter against cervical cancer?				yes
text	vhpv8_reasons	${vhpv8}=2	If NO, what are the reasons?		regex(., '^[AZ ]{1,90}+$')	Please enter only uppercase letters and spaces.	yes
select_one yesnonsp	vhpv9		Qvhpv9. Do you think your community or religious leaders would want you to vaccinate your daughter against cervical cancer?				yes
text	vhpv9_reasons	${vhpv9}=2	If NO, what are the reasons?		regex(., '^[AZ ]{1,90}+$')	Please enter only uppercase letters and spaces.	yes
select_one yesnonsp	vhpv10		Qvhpv10. Do you trust the healthcare workers who would vaccinate your daughter against cervical cancer?				yes
text	vhpv10_reasons	${vhpv10}=2	If NO, what are the reasons?		regex(., '^[AZ ]{1,90}+$')	Please enter only uppercase letters and spaces.	yes
select_one yesno	vhpv11		Qvhpv11. Have you seen or heard any negative rumors about cervical cancer vaccines?				yes
text	vhpv11_reasons	${vhpv11}=1	If YES, please explain.		regex(., '^[AZ ]{1,90}+$')	Please enter only uppercase letters and spaces.	yes
end group	group_vachpv
begin group	group_vacmpox		MPOX vaccine
note	vmbox		Module 6. Cervical cancer vaccination (HPV)
select_one yesno	vmpox1		Qvmpox1. Have you heard of monkeypox “Mpox”?				yes
select_one problem	vmbox2		Qvmpox2. In your opinion, to what extent is monkeypox “Mpox” a public health problem in your community?				yes
select_one yesnonsp	vmbox3		Qvmpox3. Has one of your relatives suffered from monkeypox “Mpox” in the last six months?				yes
select_one confidence	vmpox4		Qvmpox4. Would you trust a new vaccine against monkeypox "Mpox" if it were proposed today to protect the population?				yes
text	vmpox4_reasons	${vmpox4}=1	If NOT AT ALL CONFIDENT, what are the reasons?		regex(., '^[AZ ]{1,90}+$')	Please enter only uppercase letters and spaces.	yes
select_one yesnonsp	vmbox5		Qvmpox5. If you were offered a vaccine against monkeypox "Mpox", would you get vaccinated?				yes
text	vmbox5_reasons	${vmpox5}=2	If NO, what are the reasons?		regex(., '^[AZ ]{1,90}+$')	Please enter only uppercase letters and spaces.	yes
select_one yesnonsp	vmpox6		Qvmpox6. Once the monkeypox vaccine "Mpox" is available, would you recommend it to other eligible people?				yes
text	vmpox6_reasons	${vmpox6}=2	If NO, what are the reasons?		regex(., '^[AZ ]{1,90}+$')	Please enter only uppercase letters and spaces.	yes
select_one yesnonsp	vmbox7		Qvmpox7. Do you think most of your relatives would want you to get vaccinated against monkeypox “Mpox”?				yes
text	vmpox7_reasons	${vmpox7}=2	If NO, what are the reasons?		regex(., '^[AZ ]{1,90}+$')	Please enter only uppercase letters and spaces.	yes
select_one yesnonsp	vmpox8		Qvmpox8. Do you think your community or religious leaders would want you to get vaccinated against monkeypox “Mpox”?				yes
text	vmbox8_reasons	${vmpox8}=2	If NO, what are the reasons?		regex(., '^[AZ ]{1,90}+$')	Please enter only uppercase letters and spaces.	yes
select_one yesno	vmpox9		Qvmpox9. Have you seen or heard any negative rumors about the "Mpox" monkeypox vaccines?				yes
text	vmpox9_reasons	${vmpox9}=1	If YES, please explain.		regex(., '^[AZ ]{1,90}+$')	Please enter only uppercase letters and spaces.	yes
end group	group_vacmpox
end group	gpesec3a
end repeat	adult
date	date_vpob3		You have reached the end of the questionnaire.				yes	no-calendar
end group	debutint
calculate	end_time									${end}
geopoint	resp_gps		GPS coordinates of the household				yes

## Sheet:  choices
list_name	name	label	ub1_year	q101	medium	q101a	q103	q103a	filter	picture
birthplace	1	At home (At home)
birthplace	2	At the health center where vaccinations are administered
birthplace	3	In another health facility
birthplace	4	Another place
seg_list	1	Segment 1
seg_list	2	Segment 2
seg_list	3	Segment 3
seg_list	4	Segment 4
seg_list	5	Segment 5
seg_list	6	Segment 6
seg_list	7	Segment 7
seg_list	8	Segment 8
seg_list	9	Segment 9
seg_list	10	Segment 10
seg_list	11	Segment 11
seg_list	12	Segment 12
seg_list	13	Segment 13
seg_list	14	Segment 14
seg_list	15	Segment 15
seg_list	16	Segment 16
yesno	0	No
yesno	1	Yes
q300_list	1	Man
q300_list	2	Women
q303_list	1	18 to 24 years old
q303_list	2	25 to 34 years old
q303_list	3	35 to 44 years old
q303_list	4	45 to 54 years old
q303_list	5	55 to 64 years old
q303_list	6	65 years and older
q306_list	1	Unemployed
q306_list	2	Fisherman
q306_list	3	Farmer
q306_list	4	Health care and support services (e.g., hospital or outpatient services, long-term care facilities, laboratories and pharmacies)
q306_list	5	Vaccine manufacturing
q306_list	6	Education and its support services
q306_list	7	Production and distribution of food (e.g., agriculture, food processing and grocery stores, excluding restaurants)
q306_list	8	Childcare
q306_list	9	Public transport and its support services (including transport systems such as buses, trains, airplanes and ferries)
q306_list	10	Emergency services (e.g., firefighters, police, ambulances, paramedics, and the military)
q306_list	11	Sellers or merchants
q306_list	12	Civil servant, other sector
q306_list	13	Worker in another sector
q306_list	14	Other ……
q307_list	1	Remote work only
q307_list	2	Work in person only
q307_list	3	Working both remotely and in person
q307_list	4	No work - temporarily laid off or on seniority leave
q307_list	5	Not working - voluntary leave or sabbatical
q307_list	6	Not working - permanent layoff
q307_list	7	Not working - retired
q307_list	8	Not working - student
q307_list	10	Not working - other
q402_list	1	Yes, map observed
q402_list	2	Yes, card not found
q402_list	4	Refusal
q403_list	1	AstraZeneca
q403_list	2	Pfizer
q403_list	3	Moderna
q403_list	4	Johnson-Johnson
q403_list	5	Other
q403_list	98	Don't know
q404_list	1	One dose
q404_list	2	Two doses
q404_list	98	Don't know
q405_list	1	One dose
q405_list	2	Two doses
q405_list	3	Three doses
q406_list	1	2020
q406_list	2	2021
q406_list	3	2022
q406_list	4	2023
q406_list	5	2024
q406_list	6	Don't know
q408_list	1	A COVID-19 vaccination point that is not located in a healthcare facility
q408_list	2	Central Health Zone Office
q408_list	3	Health center/health post
q408_list	4	Medical clinic or doctor's office (private)
q408_list	5	Hospital
q408_list	6	Pharmacy
q408_list	7	Workplace
q408_list	8	Other…..
q409_list	1	No way
q409_list	2	a bit simplistic
q409_list	3	Moderately easy
q409_list	4	Very easy
q411_list	1	COVID-19 vaccination was not yet available to me.
q411_list	2	It was difficult to make an appointment,
q411_list	3	The vaccination site was difficult to access.
q411_list	4	The opening hours are not convenient
q411_list	5	The waiting time was too long.
q411_list	6	I couldn't leave my job,
q411_list	7	Sometimes people were sent home without having been vaccinated.
q411_list	8	Is there anything else? [SAVE ANSWER:
q412_list	1	Not at all satisfied
q412_list	2	Somewhat satisfied
q412_list	3	Moderately satisfied
q412_list	4	Very satisfied
q413_list	1	Nothing, you are satisfied [IF NOTHING, SKIP THE REST OF THE ANSWERS].
q413_list	2	The vaccine is not available
q413_list	3	The vaccination site does not open on time
q413_list	4	Waiting times are long.
q413_list	5	The vaccination site is not clean
q413_list	6	The staff is poorly trained
q413_list	7	The staff are disrespectful
q413_list	8	The staff don't spend enough time with people
q413_list	9	Is there anything else? [SAVE ANSWER:
q414_list	1	Very likely
q414_list	2	Quite likely
q414_list	3	Quite unlikely
q414_list	4	Very unlikely
q415_list	1	Very easy
q415_list	2	Quite easy
q415_list	3	Quite difficult
q415_list	4	Very difficult
q415_list	5	I'm not sure
q416_list	1	I don't want to be vaccinated at the moment.
q416_list	2	I don't want to be vaccinated at all.
q416_list	3	I am not part of a priority group for vaccination at the moment.
q416_list	4	don't trust the vaccine that was offered to me.
q416_list	5	I have an appointment in the future
q416_list	6	I haven't been able to get an appointment yet.
q416_list	7	I don't know how or where to get vaccinated.
q416_list	8	I was ill when the vaccine was offered to me.
q416_list	9	The vaccine is not recommended for me (for example, I have a pre-existing condition)
q416_list	10	The opening hours are inconvenient
q416_list	11	The waiting time was too long.
q416_list	12	It was difficult to find or make an appointment.
q416_list	13	I was too busy to get vaccinated.
q416_list	14	It was difficult to find childcare.
q416_list	15	I haven't had time to take time off work.
q416_list	16	I have already suffered from COVID-19
q416_list	17	I didn't have time
q416_list	18	Another reason
q417_list	1	I am not at high risk of contracting COVID-19
q417_list	2	If I catch COVID-19, I won't be very sick
q417_list	3	The severity of the pandemic has been overestimated.
q417_list	4	Vaccines in general are not effective at preventing diseases
q417_list	5	Vaccines in general are not safe.
q417_list	6	I do not trust the effectiveness of COVID-19 vaccines
q417_list	7	I do not trust the safety of COVID-19 vaccines
q417_list	8	Philosophical or religious reasons
q417_list	9	Another reason
q419_list	1	Not worried at all
q419_list	2	A little worried
q419_list	3	Moderately worried
q419_list	4	Very worried
q420_list	1	Yes, as soon as possible
q420_list	2	Yes, but consider waiting to receive it.
q420_list	3	No
q420_list	4	I'm not sure
q421_list	1	At my workplace
q421_list	2	At the family doctor's office or another doctor's office
q421_list	3	Health center/health post
q421_list	4	Other clinic, health center or other medical facility
q421_list	5	Hospital
q421_list	6	Pharmacy
q421_list	7	In-store pharmacy (e.g., inside a Target store, Publix pharmacy)
q421_list	8	Other __________
q425b2_list	1	Mosquito bites
q425b2_list	2	Contact with the senses of an infected person
q425b2_list	3	Other things to specify
q426_list	1	Yes
q426_list	2	No
q426_list	98	Don't know
q426_list	99	99. REFUSED
q505_list	1	Not important at all
q505_list	2	Somewhat important
q505_list	3	Moderately important
q505_list	4	Very important
q508_list	1	Not at all sure
q508_list	2	A little bit safe
q508_list	3	Moderately safe
q508_list	4	Very safe
BeSD4_list	1	That they are not important at all.
BeSD4_list	2	That they are somewhat important,
BeSD4_list	3	That they are moderately important,
BeSD4_list	4	They are very important
BeSD5_list	1	That they are not at all sure,
BeSD5_list	2	They seem a little too sure of themselves.
BeSD5_list	3	That they are moderately safe
BeSD5_list	4	They are very sure
BeSD6_list	1	That you do not trust them,
BeSD6_list	2	That you grant them limited trust
BeSD6_list	3	That you place average trust in them
BeSD6_list	4	That you place great trust in them
BeSD17_list	1	It's not easy at all
BeSD17_list	2	It's not very easy
BeSD17_list	3	It's moderately easy
BeSD17_list	4	It's very easy
BeSD18_list	1	It's not easy at all
BeSD18_list	2	It's not very easy
BeSD18_list	3	It's moderately easy
BeSD18_list	4	It's very easy
BeSD20_list	1	You are not at all satisfied.
BeSD20_list	2	Are you somewhat satisfied?
BeSD20_list	3	Are you moderately satisfied or
BeSD20_list	4	You are very satisfied
bank_list	1	Yes
bank_list	2	No
bank_list	3	Refusal
bank_list	98	Don't know
im35_list	1	First vaccination
im35_list	2	Each vaccination
im35_list	3	Sometimes
im35_list	4	Never
im35_list	8	Don't know
im35a_list	1	0 to 500FC
im35a_list	2	500FC to 1500FC
im35a_list	3	More than 1500 FC
im35a_list	8	Don't know
year_list	2017	2017
year_list	2018	2018
assu_list	1	I don't have health insurance
assu_list	2	Community-based health mutual organization / health insurance
assu_list	3	Health insurance provided by the employer
assu_list	4	Insurance from your spouse's employer
assu_list	5	Coverage through the health insurance market
assu_list	6	Social Security
assu_list	7	Other private commercial health insurance purchased
assu_list	8	Other details to be specified
bien_list1	1	Yes
bien_list1	2	No
bien_list2	1a	Yes
bien_list2	2a	No
bien_list3	1c	Yes
bien_list3	2C	No
bien_list4	1d	Yes
bien_list4	2d	No
camp	2018	2018
camp	2019	2019
camp	2020	2020
camp	2021	2021
camp	2022	2022
camp	2023	2023
camp	2024	2024
cap_list	1	Very capable
cap_list	2	Able
cap_list	3	Not capable
cap_list	4	Not capable at all
cap_list	5	Don't know
source_list	1	National Institute of Public Health
source_list	2	PEV
source_list	3	INRB
source_list	4	Provincial, territorial or regional health authorities
source_list	5	The World Health Organization (WHO)
source_list	6	Pharmaceutical companies producing COVID-19 vaccines
source_list	7	Scientists and researchers in the field of health
source_list	8	My doctor
source_list	9	Other healthcare professionals (e.g., nurses, pharmacists)
source_list	10	Alternative health providers (traditional healers, naturopaths, homeopaths, etc.)
source_list	11	Community relays
source_list	12	Friends or family
source_list	13	Experience or knowledge of other people
source_list	14	Social networks
source_list	15	Another source
csp_list	1	I completely agree
csp_list	2	All right
csp_list	3	I disagree
csp_list	4	I completely disagree
csc_list	1	Not at all confident
csc_list	2	A little trust
csc_list	3	Moderately confident
csc_list	4	Very high level of trust
yesno_list	1	Yes
yesno_list	2	No
col_list	1	Yes
col_list	2	No
col_list	3	I'm not sure
col_list	4	I am not currently working or attending school.
cola_list	1	Yes
cola_list	2	No
cola_list	3	I'm not sure
friend_list	1	Yes
friend_list	2	No
friend_list	3	Not sure
chef_list	1	Yes
chef_list	2	No
chef_list	98	I don't know
prob_list	1	No way
prob_list	2	Quite likely
prob_list	3	Extremely likely
fear_list	1	Not worried at all
fear_list	2	A little worried
fear_list	3	Moderately worried
fear_list	4	Very worried
qte_list	1	I am not receiving any information
qte_list	2	I am not receiving enough information.
qte_list	3	I am receiving enough information.
qte_list	4	I'm receiving too much information.
info_list	1	I have not received any information.
info_list	2	I haven't received enough information.
info_list	3	I have received enough information.
info_list	4	I received too much information.
dose_list	1	DEFINITELY ANOTHER VACCINE
dose_list	2	WILL PROBABLY GET VACCINATED AGAIN
dose_list	3	WILL PROBABLY NOT GET VACCINATED
dose_list	4	WILL CERTAINLY NOT GET VACCINATED
dose_list	5	NOT SURE
cc_list	1	Not at all confident
cc_list	2	A little confident
cc_list	3	Moderately confident
cc_list	4	Very confident
notebook_list	1	Yes, only a vaccination booklet or card is required.
notebook_list	2	Yes, just one other document
notebook_list	3	Yes, he has a notebook or a map and another document
notebook_list	4	No, he has neither a notebook, nor a map, nor any other document.
notebook1_list	1	Yes, only a vaccination booklet or card is visible.
notebook1_list	2	Yes, only one other document has been viewed.
notebook1_list	3	Yes, has a map or a map and another document seen
notebook1_list	4	No, he has neither a notebook, nor a map, nor any other document seen
carnet2_list	1	Yes, only a vaccination booklet or card is visible.
carnet2_list	2	Yes, only one other document has been viewed.
carnet2_list	3	Yes, has a map or a map and another document seen
carnet2_list	4	No, he has neither a notebook, nor a map, nor any other document seen
carnet3_list	1	Yes, document seen
carnet3_list	2	Yes, but the notebook wasn't seen.
carnet3_list	99	No document
carnet4_list	1	Original
carnet4_list	2	Replacement or copy
carnet4_list	3	Don't know
map_list	1	Lost map
map_list	2	Map destroyed
map_list	3	Others
category_list	1	6-23 Months
category_list	2	Less than 6 months
category_list	3	More than 23 months
cert_list	1	Yes, seen
cert_list	2	Yes, I didn't see it.
cert_list	3	No
cert_list	8	Don't know
code_list	1	Come back later: household absentees
code_list	2	To be completed: interview started but not finished
code_list	3	Refusal: someone is present, but refuses to participate
code_list	4	Done: all the necessary information has been collected
how many_list	once	Once
how many_list	twice	Twice
how many_list	three times	Three times
how many_list	four times	Four times
how many_list	more than four times	More than four times
how many_list	NSP	NSP
comp_list	1	Increased
comp_list	2	Has not changed
comp_list	3	Decreased
comp_list	4	Don't know
completed	1	Completed
completed	2	Denied
completed	3	Partially completed
completed	4	Eligible children
completed	5	Others
declare_list	1	Yes
declare_list	2	No
declare_list	8	Don't know
disp_ist	1	Yes, still available
disp_ist	2	Yes, sometimes available
disp_ist	3	No, not available
disp_ist	4	Don't know
dispjj_list	1	Yes, all vaccines/supplements were available
dispjj_list	2	Yes, some vaccines/supplements were available
dispjj_list	3	No, no vaccine/input was available
dispjj_list	4	Don't know
etc_list	1	Bride)
etc_list	2	de facto union
etc_list	3	Separated
etc_list	4	Bachelor
etc_list	5	Divorcee)
etc_list	6	Widow
grav_list	1	Very serious
grav_list	2	Severe
grav_list	3	Not serious
grav_list	4	Not serious at all
im13_list	1	Any "no" or "N/A"
im13_list	2	At least 1 "Yes"
im15_list	1	Yes, within 6 weeks
im15_list	2	Yes, but within 6 weeks
im15_list	3	No
im15_list	4	NSP
im28_list	1	Good
im28_list	2	Bad
im28_list	8	Don't know
im30_list	1	In the same village/neighborhood as the household
im30_list	2	In a different village/neighborhood than the household
im30_list	3	Other
im31_list	1	0 sessions
im31_list	2	1 session
im31_list	3	2 sessions
im31_list	4	3 sessions
im31_list	5	4 sessions
im31_list	6	5 sessions
im31_list	7	6 sessions
im31_list	8	Don't know
imx_list	1	Yes
imx_list	2	No
imx_list	8	NSP
incert_list	1	No
incert_list	2	Uncertain
incert_list	3	Yes
incert_list	4	Not applicable
day_list	Monday	Monday
day_list	Tuesday	Tuesday
day_list	Wednesday	Wednesday
day_list	THURSDAY	THURSDAY
day_list	Friday	Friday
day_list	SATURDAY	SATURDAY
day_list	Sunday	Sunday
list_canaux	1	TV
list_canaux	2	Radio
list_canaux	3	Associations/meetings
list_canaux	4	Social mobilization/community relay
list_canaux	5	Posters/banners
list_canaux	6	Newspapers
list_canaux	7	Church/mosque
list_canaux	8	Healthcare personnel
list_canaux	9	Friends/colleagues/neighbors
list_canaux	10	Vehicles equipped with sound systems
list_canaux	11	SMS
list_canaux	12	Internet
list_canaux	13	NSP
list_canaux	14	Other
list_canaux	15	Advertising panels
list_diseases	1	Tuberculosis
list_diseases	2	Diphtheria
list_diseases	3	Whooping cough
list_diseases	4	Hepatitis
list_diseases	5	Haemophilis influenzae (Respiratory infections)
list_diseases	6	Poliomyelitis
list_diseases	7	Measles
list_diseases	8	Yellow fever
list_diseases	9	Tetanus
list_diseases	10	NSP
list_diseases	14	Pneumonia
list_diseases	12	Meningitis
list_diseases	13	Diarrhea
list_diseases	11	Other
list_nbf	1	1 time
list_nbf	2	twice
list_nbf	3	3 times
list_nbf	4	more than 3 times
list_personnel	1	Healthcare personnel (nurses, doctors, etc.)
list_personnel	2	Parents
list_personnel	3	Grandparents
list_personnel	4	Other parents
list_personnel	5	Friends/colleagues/neighbors
list_personnel	6	Social mobilizers / community liaisons
list_personnel	7	Chief of district/village/customary authority
list_personnel	8	Journalist
list_personnel	9	Opinion leader
list_personnel	10	Theatre actor
list_personnel	11	Pastor/priest/imam
list_personnel	12	NSP
list_personnel	13	Other
list_personnel	14	Traditional healer
lodge_list	1	Owner
lodge_list	2	Tenant
lodge_list	6	Other
ment_list	1	Mentioned
ment_list	2	Not mentioned
my_list	1	Very good
my_list	2	Good
my_list	3	Bad
my_list	4	Very bad
my_list	5	Don't know
my_list	6	Not applicable
mesur_list	1	Very safe
mesur_list	2	On
mesur_list	3	Unsafe
mesur_list	4	Not at all sure
mesur_list	5	Don't know
middle_list	1	Urban
middle_list	2	Rural
month_list	January	January
month_list	FEBRUARY	FEBRUARY
month_list	March	March
month_list	april	April
month_list	may	May
month_list	June	June
month_list	July	July
month_list	august	August
month_list	september	September
month_list	october	October
month_list	november	November
month_list	December	December
month_list	98	Don't know
[list]	1	Morning
[list]	2	Noon
[list]	3	Evening
[list]	4	Anytime
Montpay	1	Less than500 Francs
Montpay	2	500-1500 Francs
Montpay	3	Over 1500 Francs
Montpay	4	NSP
ntimes_list	1	A
ntimes_list	2	Two
ntimes_list	3	Three or more
ntimes_list	4	Don't know
niv_list	0	no study at all
niv_list	1	Primary not finished
niv_list	2	Primary school completed
niv_list	3	Secondary unfinished
niv_list	4	Secondary school completed
niv_list	5	University/higher education not completed
niv_list	6	University/higher education completed
niv_list	7	Other
niv_list	8	Don't know
niv_list	9	No response
percp_ist	1	Negatively
percp_ist	2	Some negatively and others
percp_ist	3	Positively
percp_ist	4	Don't know
percp_list	1	Negatively
percp_list	2	Some negatively, and others positively.
percp_list	3	Positively
percp_list	4	Don't know
disp_list	1	Yes, still available
disp_list	2	Yes, sometimes available
disp_list	3	No, not available
disp_list	4	Don't know
prob_sante	1	fever
prob_sante	2	Abscess
prob_sante	3	Other
prof_list	0	Unemployed
prof_list	1	Farmer/livestock breeder
prof_list	2	Healthcare and support services (e.g., hospital or outpatient services, laboratories and pharmacies)
prof_list	3	vaccine manufacturing
prof_list	4	Education and its support services
prof_list	5	Production and distribution of foodstuffs (food processing and groceries)
prof_list	6	Childcare
prof_list	7	Public transport and its support services (planes, buses, trains)
prof_list	8	Emergency services (firefighters, police, ambulance, paramedics, army)
prof_list	9	Fisherman
prof_list	10	Civil servant, other sector
prof_list	11	Open another sector
prof_list	12	shopkeeper
prof_list	13	Others
prof_list	14	Pupil / Student
qa208_list	1	Luba
qa208_list	2	Kongo
qa208_list	3	Swahili
qa208_list	4	Mungala
qa208_list	5	Other
rais_ist	1	Because of the lockdown
rais_ist	2	Due to a lack of means of transport
rais_ist	3	For fear of being infected with COVID-19
rais_ist	4	the health facility had closed
rais_ist	5	Other details to be specified
rais_list	1	Because of the lockdown
rais_list	2	Due to a lack of means of transport
rais_list	3	For fear of being infected with COVID-19
rais_list	4	the health facility had closed
rais_list	5	Other
re_list	1	Mother of the child
re_list	2	Child's guardian
rel_list	1	No religion
rel_list	2	Catholic
rel_list	3	Protestant
rel_list	4	Kimbanguist
rel_list	5	Muslim woman
rel_list	6	Revival/Independent Church
rel_list	8	Don't know
rel_list	9	No response
rel_list	7	Other religion (please specify)
sex_list	1	Male
sex_list	2	Female
time_list	1	Less than 5 minutes
time_list	2	Between 5 and 30 minutes
time_list	3	Between 31 and 60 minutes
time_list	4	More than 60 minutes
supool_list	1	Alex Bala Mavungu
supool_list	2	Serge Mbuyi
supool_list	3	John Kamwina
supool_list	4	Francis Iyese
supool_list	5	Jean Claude Kazitala
supool_list	6	Grandpa Mayala
supool_list	7	Jacques Kabamba
supool_list	8	Alex Bukasa Kanyama
supool_list	9	Gideon Mushadi
supool_list	10	Denise Ngondo
supool_list	11	Arlette Mavila
supool_list	12	Paulette ZonzikA
supool_list	13	Genesis Lobukulu
supool_list	14	Elvis Kuburhanwa
supool_list	15	Odrade Chabikuli
supool_list	16	John Yangongo
supool_list	17	Nathalie Likengo
supool_list	18	Gracia Kabangu
supool_list	19	Gabriel Kyomba
supool_list	20	Emmanuel Mpeti
supool_list	21	Marie Louise Kpanda
supool_list	22	Christine Mufuta
supool_list	23	Armand Mutwadi
supool_list	24	Ruffin Dinzila
supool_list	25	Eddy Kieto Zola
supool_list	26	Zarine Lutonamo
supool_list	27	Nickson Sonabo
typeassu_list	1	Community-based health mutual organization / health insurance
typeassu_list	2	Health insurance provided by the employer
typeassu_list	3	Social Security
typeassu_list	4	Other private commercial health insurance purchased
typeassu_list	5	Other details to be specified
vac_list	1	Yes, with a card
vac_list	2	Yes, declaration
vac_list	3	Not yet
vacpr_list	1	Very strongly
vacpr_list	2	Strongly
vacpr_list	3	Weakly
vacpr_list	4	Very slightly
vacpr_list	5	Don't know
visit_list	1	Visit 1
visit_list	2	Visit 2
visit_list	3	Visit 3
visit_list	Yes	Yes
visit_list	No	No
vs106_list	1	Local public health care establishment (SCE)
vs106_list	2	Local private healthcare establishment (SHE)
vs106_list	4	Public health care establishment (HCE) other than (1), further
vs106_list	5	Private health care establishment (HCE) other than (2), further
vs106_list	6	Not applicable, as the youngest child is not vaccinated.
vs107_list	1	Yes
vs107_list	2	No
vs107_list	99	Doesn't remember
vs119_list	1	His
vs119_list	2	Child of a neighbor
vs119_list	3	Child of friends
vs119_list	4	Child of his family
vs119_list	5	His child's friend
vs119_list	6	Other
vs121_list	1	On the arm
vs121_list	2	On the thigh
vs121_list	3	Other
vs137_list	1	Once
vs137_list	2	2-3 times
vs137_list	3	4 times or more
vs137_list	4	99: Don't know
vs138_list	0	Less than a month
vs138_list	1	1-2 months
vs138_list	2	3-6 months
vs138_list	3	More than 6 months 99: Don't know
vs139_list	1	The entire household
vs139_list	2	A single adult
vs139_list	3	Two or more adults
vs139_list	4	Children alone
vs139_list	5	A group of adults and children
vs139_list	99	Don't know
vs140_list	1	To work
vs140_list	2	Visiting the family
vs140_list	3	Leisure or holidays
vs140_list	4	Other
vs140_list	99	99: Don't know
vs26b_list	1	Just one other document
vs26b_list	2	No notebook, map, or other document available
vs69a_list	1	Map kept in the center
vs69a_list	2	Out of stock at the center
vs69a_list	99	Don't know
vs69a_list	3	Other
vs85f_list	7	6 sessions
vs85f_list	99	NSP
vs85l_list	1	Less than 500 Francs
vs85l_list	2	500-1500 Francs
vs85l_list	3	Over 1500 Francs
vs85l_list	99	NSP
vs85n_list	1	First vaccination
vs85n_list	2	Each vaccination
vs85n_list	3	Sometimes
vs85n_list	4	Never
vs85n_list	99	NSP
vs85o_list	1	Card/token
vs85o_list	2	Weighing
vs85o_list	3	Tip
vs85o_list	4	Syringes
vs85o_list	5	Drugs
vs85o_list	6	Transport provider for vaccine collection
vs85o_list	7	Others
vs85s_list	1	1 time
vs85s_list	2	twice
vs85s_list	3	3 times
vs85s_list	4	4 times
vs85s_list	5	5 times
vs85s_list	6	6 times
vs85s_list	7	7 times or more
vs85s_list	8	Don't know
PVC	Bas Uele Province	Bas Uele Province
PVC	eq Ecuador Province	eq Ecuador Province
PVC	HK Haut Katanga Province	HK Haut Katanga Province
PVC	hl Haut Lomami Province	hl Haut Lomami Province
PVC	hu Haut Uele Province	hu Haut Uele Province
PVC	Ituri Province	Ituri Province
PVC	kc Kongo Central Province	kc Kongo Central Province
PVC	Kasai Oriental Province	Kasai Oriental Province
PVC	kg Kwango Province	kg Kwango Province
PVC	Kwilu Province	Kwilu Province
PVC	kn Kinshasa Province	kn Kinshasa Province
PVC	kr Kasai Central Province	kr Kasai Central Province
PVC	ks Kasai Province	ks Kasai Province
PVC	Lualaba Province	Lualaba Province
PVC	Lomami Province	Lomami Province
PVC	Maindombe Province	Maindombe Province
PVC	mg Mongala Province	mg Mongala Province
PVC	Maniema Province	Maniema Province
PVC	nk North Kivu Province	nk North Kivu Province
PVC	North Ubangi Province	North Ubangi Province
PVC	South Kivu Province	South Kivu Province
PVC	Sankuru Province	Sankuru Province
PVC	South Ubangi Province	South Ubangi Province
PVC	Tanganyika Province	Tanganyika Province
PVC	tp Tshopo Province	tp Tshopo Province
PVC	you Tshuapa Province	you Tshuapa Province
zs_list	Aketi Health Zone	Aketi Health Zone		Bas Uele Province	Rural
zs_list	bu Ango Health Zone	bu Ango Health Zone		Bas Uele Province	Rural
zs_list	Ganga Health Zone	Ganga Health Zone		Bas Uele Province	Rural
zs_list	Likati Health Zone	Likati Health Zone		Bas Uele Province	Rural
zs_list	Monga Health Zone	Monga Health Zone		Bas Uele Province	Rural
zs_list	Buta Health Zone	Buta Health Zone		Bas Uele Province	Urban
zs_list	eq Bolomba Health Zone	eq Bolomba Health Zone		eq Ecuador Province	Rural
zs_list	eq Ingende Health Zone	eq Ingende Health Zone		eq Ecuador Province	Rural
zs_list	Makanza Health Zone	Makanza Health Zone		eq Ecuador Province	Rural
zs_list	eq Mampoko Health Zone	eq Mampoko Health Zone		eq Ecuador Province	Rural
zs_list	Ntondo Health Zone	Ntondo Health Zone		eq Ecuador Province	Rural
zs_list	Wangata Health Zone	Wangata Health Zone		eq Ecuador Province	Urban
zs_list	hk Kilela Balanda Health Zone	hk Kilela Balanda Health Zone		HK Haut Katanga Province	Rural
zs_list	Kilwa Health Zone	Kilwa Health Zone		HK Haut Katanga Province	Rural
zs_list	hk Mufunga Sampwe Health Zone	hk Mufunga Sampwe Health Zone		HK Haut Katanga Province	Rural
zs_list	hk Kikula Health Zone	hk Kikula Health Zone		HK Haut Katanga Province	Urban
zs_list	HK Panda Health Zone	HK Panda Health Zone		HK Haut Katanga Province	Urban
zs_list	HK Kambove Health Zone	HK Kambove Health Zone		HK Haut Katanga Province	Rural
zs_list	hl Kaniama Health Zone	hl Kaniama Health Zone		hl Haut Lomami Province	Rural
zs_list	hl Kayamba Health Zone	hl Kayamba Health Zone		hl Haut Lomami Province	Rural
zs_list	hl Kitenge Health Zone	hl Kitenge Health Zone		hl Haut Lomami Province	Rural
zs_list	hl Lwamba Health Zone	hl Lwamba Health Zone		hl Haut Lomami Province	Rural
zs_list	hl Mulongo Health Zone	hl Mulongo Health Zone		hl Haut Lomami Province	Rural
zs_list	hl Kamina Health Zone	hl Kamina Health Zone		hl Haut Lomami Province	Urban
zs_list	Hu Aba Health Zone	Hu Aba Health Zone		hu Haut Uele Province	Rural
zs_list	hu Boma Mangbetu Health Zone	hu Boma Mangbetu Health Zone		hu Haut Uele Province	Rural
zs_list	hu Dungu Health Zone	hu Dungu Health Zone		hu Haut Uele Province	Rural
zs_list	Faradje Health Zone	Faradje Health Zone		hu Haut Uele Province	Rural
zs_list	Hu Pawa Health Zone	Hu Pawa Health Zone		hu Haut Uele Province	Rural
zs_list	Isiro Health Zone	Isiro Health Zone		hu Haut Uele Province	Rural
zs_list	it Fataki Health Zone	it Fataki Health Zone		Ituri Province	Rural
zs_list	Gety Health Zone	Gety Health Zone		Ituri Province	Rural
zs_list	it Laybo Health Zone	it Laybo Health Zone		Ituri Province	Rural
zs_list	it Linga Health Zone	it Linga Health Zone		Ituri Province	Rural
zs_list	Mangala Health Zone	Mangala Health Zone		Ituri Province	Rural
zs_list	it Bunia Health Zone	it Bunia Health Zone		Ituri Province	Rural
zs_list	kc Kimpangu Health Zone	kc Kimpangu Health Zone		kc Kongo Central Province	Rural
zs_list	kc Kuimba Health Zone	kc Kuimba Health Zone		kc Kongo Central Province	Rural
zs_list	kc Luozi Health Zone	kc Luozi Health Zone		kc Kongo Central Province	Rural
zs_list	kc Boma Health Zone	kc Boma Health Zone		kc Kongo Central Province	Urban
zs_list	kc Matadi Health Zone	kc Matadi Health Zone		kc Kongo Central Province	Urban
zs_list	Kc Kisantu Health Zone	Kc Kisantu Health Zone		kc Kongo Central Province	Rural
zs_list	ke Cilundu Health Zone	ke Cilundu Health Zone		Kasai Oriental Province	Rural
zs_list	Lukelenge Health Zone	Lukelenge Health Zone		Kasai Oriental Province	Rural
zs_list	Ke Mukumbi Health Zone	Ke Mukumbi Health Zone		Kasai Oriental Province	Rural
zs_list	Bibanga Health Zone	Bibanga Health Zone		Kasai Oriental Province	Urban
zs_list	ke Mpokolo Health Zone	ke Mpokolo Health Zone		Kasai Oriental Province	Urban
zs_list	ke Citenge Health Zone	ke Citenge Health Zone		Kasai Oriental Province	Rural
zs_list	kg Boko Health Zone	kg Boko Health Zone		kg Kwango Province	Rural
zs_list	kg Feshi Health Zone	kg Feshi Health Zone		kg Kwango Province	Rural
zs_list	kg Kajiji Health Zone	kg Kajiji Health Zone		kg Kwango Province	Rural
zs_list	kg Kitenda Health Zone	kg Kitenda Health Zone		kg Kwango Province	Rural
zs_list	kg Tembo Health Zone	kg Tembo Health Zone		kg Kwango Province	Rural
zs_list	kg Kenge Health Zone	kg Kenge Health Zone		kg Kwango Province	Rural
zs_list	Bagata Health Zone	Bagata Health Zone		Kwilu Province	Rural
zs_list	kl Djuma Health Zone	kl Djuma Health Zone		Kwilu Province	Rural
zs_list	Kingandu Health Zone	Kingandu Health Zone		Kwilu Province	Rural
zs_list	kl Mokala Health Zone	kl Mokala Health Zone		Kwilu Province	Rural
zs_list	kl Pay Kongila Health Zone	kl Pay Kongila Health Zone		Kwilu Province	Rural
zs_list	Bandundu Health Zone	Bandundu Health Zone		Kwilu Province	Urban
zs_list	kn Bandalungwa Health Zone	kn Bandalungwa Health Zone		kn Kinshasa Province	Urban
zs_list	kn Kalamu 1 Health Zone	kn Kalamu 1 Health Zone		kn Kinshasa Province	Urban
zs_list	kn Lemba Health Zone	kn Lemba Health Zone		kn Kinshasa Province	Urban
zs_list	Lingwala Health Zone	Lingwala Health Zone		kn Kinshasa Province	Urban
zs_list	kn Ndjili Health Zone	kn Ndjili Health Zone		kn Kinshasa Province	Urban
zs_list	kn Mount Ngafula 1 Health Zone	kn Mount Ngafula 1 Health Zone		kn Kinshasa Province	Rural
zs_list	kn Nsele Health Zone	kn Nsele Health Zone		kn Kinshasa Province	Rural
zs_list	kr Bunkonde Health Zone	kr Bunkonde Health Zone		kr Kasai Central Province	Rural
zs_list	kr Dibaya Health Zone	kr Dibaya Health Zone		kr Kasai Central Province	Rural
zs_list	kr Luiza Health Zone	kr Luiza Health Zone		kr Kasai Central Province	Rural
zs_list	kr Mutoto Health Zone	kr Mutoto Health Zone		kr Kasai Central Province	Rural
zs_list	kr Tshikula Health Zone	kr Tshikula Health Zone		kr Kasai Central Province	Rural
zs_list	kr Kananga Health Zone	kr Kananga Health Zone		kr Kasai Central Province	Urban
zs_list	ks Banga Lubaka Health Zone	ks Banga Lubaka Health Zone		ks Kasai Province	Rural
zs_list	ks Dekese Health Zone	ks Dekese Health Zone		ks Kasai Province	Rural
zs_list	ks Mushenge Health Zone	ks Mushenge Health Zone		ks Kasai Province	Rural
zs_list	ks Mweka Health Zone	ks Mweka Health Zone		ks Kasai Province	Rural
zs_list	ks Tshikapa Health Zone	ks Tshikapa Health Zone		ks Kasai Province	Rural
zs_list	ks Kanzala Health Zone	ks Kanzala Health Zone		ks Kasai Province	Urban
zs_list	Dilolo Health Zone	Dilolo Health Zone		Lualaba Province	Rural
zs_list	Kafakumba Health Zone	Kafakumba Health Zone		Lualaba Province	Rural
zs_list	ll Kanzenze Health Zone	ll Kanzenze Health Zone		Lualaba Province	Rural
zs_list	Lualaba Health Zone	Lualaba Health Zone		Lualaba Province	Rural
zs_list	Mutshatsha Health Zone	Mutshatsha Health Zone		Lualaba Province	Rural
zs_list	Dilala Health Zone	Dilala Health Zone		Lualaba Province	Urban
zs_list	lm Kalambayi Kabanga Health Zone	lm Kalambayi Kabanga Health Zone		Lomami Province	Rural
zs_list	Kamiji Health Zone	Kamiji Health Zone		Lomami Province	Rural
zs_list	Lubao Health Zone	Lubao Health Zone		Lomami Province	Rural
zs_list	lm Ludimbi Lukula Health Zone	lm Ludimbi Lukula Health Zone		Lomami Province	Rural
zs_list	Luputa Health Zone	Luputa Health Zone		Lomami Province	Rural
zs_list	lm Mweneditu Health Zone	lm Mweneditu Health Zone		Lomami Province	Urban
zs_list	Bolobo Health Zone	Bolobo Health Zone		Maindombe Province	Rural
zs_list	md Bosobe Health Zone	md Bosobe Health Zone		Maindombe Province	Rural
zs_list	Kiri Health Zone	Kiri Health Zone		Maindombe Province	Rural
zs_list	md Ntandembelo Health Zone	md Ntandembelo Health Zone		Maindombe Province	Rural
zs_list	Oshwe Health Zone	Oshwe Health Zone		Maindombe Province	Rural
zs_list	md Inongo Health Zone	md Inongo Health Zone		Maindombe Province	Rural
zs_list	mg Boso Manzi Health Zone	mg Boso Manzi Health Zone		mg Mongala Province	Rural
zs_list	mg Boso Mondanda Health Zone	mg Boso Mondanda Health Zone		mg Mongala Province	Rural
zs_list	mg Bosondjo Health Zone	mg Bosondjo Health Zone		mg Mongala Province	Rural
zs_list	mg Lolo Health Zone	mg Lolo Health Zone		mg Mongala Province	Rural
zs_list	mg Yambuku Health Zone	mg Yambuku Health Zone		mg Mongala Province	Rural
zs_list	mg Lisala Health Zone	mg Lisala Health Zone		mg Mongala Province	Rural
zs_list	mn Kalima Health Zone	mn Kalima Health Zone		Maniema Province	Rural
zs_list	mn Kasongo Health Zone	mn Kasongo Health Zone		Maniema Province	Rural
zs_list	mn Kunda Health Zone	mn Kunda Health Zone		Maniema Province	Rural
zs_list	Lusangi Health Zone	Lusangi Health Zone		Maniema Province	Rural
zs_list	mn Punia Health Zone	mn Punia Health Zone		Maniema Province	Rural
zs_list	Kindu Health Zone	Kindu Health Zone		Maniema Province	Urban
zs_list	nk Alimbongo Health Zone	nk Alimbongo Health Zone		nk North Kivu Province	Rural
zs_list	nk Kayna Health Zone	nk Kayna Health Zone		nk North Kivu Province	Rural
zs_list	nk Kyondo Health Zone	nk Kyondo Health Zone		nk North Kivu Province	Rural
zs_list	nk Walikale Health Zone	nk Walikale Health Zone		nk North Kivu Province	Rural
zs_list	nk Butembo Health Zone	nk Butembo Health Zone		nk North Kivu Province	Urban
zs_list	nk Goma Health Zone	nk Goma Health Zone		nk North Kivu Province	Urban
zs_list	Nude Bili Health Zone	Nude Bili Health Zone		North Ubangi Province	Rural
zs_list	Bosobolo Health Zone	Bosobolo Health Zone		North Ubangi Province	Rural
zs_list	Businga Health Zone	Businga Health Zone		North Ubangi Province	Rural
zs_list	Karawa Health Zone	Karawa Health Zone		North Ubangi Province	Rural
zs_list	Wapinda Health Zone	Wapinda Health Zone		North Ubangi Province	Rural
zs_list	Gbadolite Health Zone	Gbadolite Health Zone		North Ubangi Province	Rural
zs_list	sk Bunyakiri Health Zone	sk Bunyakiri Health Zone		South Kivu Province	Rural
zs_list	sk Idjwi Health Zone	sk Idjwi Health Zone		South Kivu Province	Rural
zs_list	sk Kabare Health Zone	sk Kabare Health Zone		South Kivu Province	Rural
zs_list	sk Kalehe Health Zone	sk Kalehe Health Zone		South Kivu Province	Rural
zs_list	sk Katana Health Zone	sk Katana Health Zone		South Kivu Province	Rural
zs_list	Ibanda Health Zone	Ibanda Health Zone		South Kivu Province	Urban
zs_list	sn Dikungu Health Zone	sn Dikungu Health Zone		Sankuru Province	Rural
zs_list	sn Minga Health Zone	sn Minga Health Zone		Sankuru Province	Rural
zs_list	sn Omendjadi Health Zone	sn Omendjadi Health Zone		Sankuru Province	Rural
zs_list	sn Ototo Health Zone	sn Ototo Health Zone		Sankuru Province	Rural
zs_list	sn Tshumbe Health Zone	sn Tshumbe Health Zone		Sankuru Province	Rural
zs_list	sn Lodja Health Zone	sn Lodja Health Zone		Sankuru Province	Urban
zs_list	su Bogosenubea Health Zone	su Bogosenubea Health Zone		South Ubangi Province	Rural
zs_list	su Bwamanda Health Zone	su Bwamanda Health Zone		South Ubangi Province	Rural
zs_list	Kungu Health Zone	Kungu Health Zone		South Ubangi Province	Rural
zs_list	su Mbaya Health Zone	su Mbaya Health Zone		South Ubangi Province	Rural
zs_list	su Tandala Health Zone	su Tandala Health Zone		South Ubangi Province	Rural
zs_list	Gemena Health Zone	Gemena Health Zone		South Ubangi Province	Rural
zs_list	Ankoro Health Zone	Ankoro Health Zone		Tanganyika Province	Rural
zs_list	Kabalo Health Zone	Kabalo Health Zone		Tanganyika Province	Rural
zs_list	Kiambi Health Zone	Kiambi Health Zone		Tanganyika Province	Rural
zs_list	tn Kongolo Health Zone	tn Kongolo Health Zone		Tanganyika Province	Rural
zs_list	tn Mbulula Health Zone	tn Mbulula Health Zone		Tanganyika Province	Rural
zs_list	Kalemie Health Zone	Kalemie Health Zone		Tanganyika Province	Urban
zs_list	Banalia Health Zone	Banalia Health Zone		tp Tshopo Province	Rural
zs_list	tp Basali Health Zone	tp Basali Health Zone		tp Tshopo Province	Rural
zs_list	Lowa Health Zone	Lowa Health Zone		tp Tshopo Province	Rural
zs_list	tp Ubundu Health Zone	tp Ubundu Health Zone		tp Tshopo Province	Rural
zs_list	Mangobo Health Zone	Mangobo Health Zone		tp Tshopo Province	Urban
zs_list	Tshopo Health Zone	Tshopo Health Zone		tp Tshopo Province	Rural
zs_list	Befale Health Zone	Befale Health Zone		you Tshuapa Province	Rural
zs_list	Busanga Health Zone	Busanga Health Zone		you Tshuapa Province	Rural
zs_list	Ikela Health Zone	Ikela Health Zone		you Tshuapa Province	Rural
zs_list	Mompono Health Zone	Mompono Health Zone		you Tshuapa Province	Rural
zs_list	Mondombe Health Zone	Mondombe Health Zone		you Tshuapa Province	Rural
zs_list	you Boende Health Zone	you Boende Health Zone		you Tshuapa Province	Rural
as_list	Ngombo Health Area	Ngombo Health Area					Aketi Health Zone
as_list	bu Mombwasa Health Area	bu Mombwasa Health Area					Aketi Health Zone
as_list	Dulia Health Area	Dulia Health Area					Aketi Health Zone
as_list	Bondunga Health Area	Bondunga Health Area					Aketi Health Zone
as_list	Boganga Health Area	Boganga Health Area					Aketi Health Zone
as_list	Makoko Health Area	Makoko Health Area					Aketi Health Zone
as_list	Pesana Health Area	Pesana Health Area					Aketi Health Zone
as_list	bu Mbabi Health Area	bu Mbabi Health Area					bu Ango Health Zone
as_list	bu Yassa Health Area	bu Yassa Health Area					bu Ango Health Zone
as_list	Digba Health Area	Digba Health Area					bu Ango Health Zone
as_list	Makpoyo Health Area	Makpoyo Health Area					bu Ango Health Zone
as_list	bu Sangwa Health Area	bu Sangwa Health Area					bu Ango Health Zone
as_list	bu Mboti Health Area	bu Mboti Health Area					bu Ango Health Zone
as_list	bu Banda Health Area	bu Banda Health Area					bu Ango Health Zone
as_list	Assa Health Area	Assa Health Area					bu Ango Health Zone
as_list	bu Yeme Health Area	bu Yeme Health Area					Buta Health Zone
as_list	bu Sukisa Health Area	bu Sukisa Health Area					Buta Health Zone
as_list	Left Bank Health Area	Left Bank Health Area					Buta Health Zone
as_list	Popoka Health Area	Popoka Health Area					Buta Health Zone
as_list	bu Bamaria Health Area	bu Bamaria Health Area					Buta Health Zone
as_list	bu Yema Health Area	bu Yema Health Area					Buta Health Zone
as_list	Maselebende Health Area	Maselebende Health Area					Buta Health Zone
as_list	bu Ngbandaa Health Area	bu Ngbandaa Health Area					Ganga Health Zone
as_list	bu Danga Health Area	bu Danga Health Area					Ganga Health Zone
as_list	bu Ganga Health Area	bu Ganga Health Area					Ganga Health Zone
as_list	Mabodho Health Area	Mabodho Health Area					Ganga Health Zone
as_list	Mongbaya Health Area	Mongbaya Health Area					Ganga Health Zone
as_list	Bambesa Health Area	Bambesa Health Area					Ganga Health Zone
as_list	Zobia Health Area	Zobia Health Area					Ganga Health Zone
as_list	bu Kulu Health Area	bu Kulu Health Area					Likati Health Zone
as_list	bu Ngay Health Area	bu Ngay Health Area					Likati Health Zone
as_list	bu Muma Health Area	bu Muma Health Area					Likati Health Zone
as_list	bu Difongo Health Area	bu Difongo Health Area					Likati Health Zone
as_list	Mobenge Health Area	Mobenge Health Area					Likati Health Zone
as_list	bu Tobongisa Health Area	bu Tobongisa Health Area					Likati Health Zone
as_list	bu Mabangu Health Area	bu Mabangu Health Area					Likati Health Zone
as_list	bu Mengi Health Area	bu Mengi Health Area					Monga Health Zone
as_list	Monga 2 Health Area	Monga 2 Health Area					Monga Health Zone
as_list	bu Kolo Health Area	bu Kolo Health Area					Monga Health Zone
as_list	bu Lobi Health Area	bu Lobi Health Area					Monga Health Zone
as_list	Bela Health Area	Bela Health Area					Monga Health Zone
as_list	bu Biasu Health Area	bu Biasu Health Area					Monga Health Zone
as_list	bu Bondeko Health Area	bu Bondeko Health Area					Monga Health Zone
as_list	eq Bosomondomba Health Area	eq Bosomondomba Health Area					eq Bolomba Health Zone
as_list	eq Mbango Health Area	eq Mbango Health Area					eq Bolomba Health Zone
as_list	eq Bosombifa Health Area	eq Bosombifa Health Area					eq Bolomba Health Zone
as_list	eq Ligbalo Health Area	eq Ligbalo Health Area					eq Bolomba Health Zone
as_list	Itotela Health Area	Itotela Health Area					eq Bolomba Health Zone
as_list	Bolenge Health Area	Bolenge Health Area					eq Bolomba Health Zone
as_list	eq Belonga Health Area	eq Belonga Health Area					eq Bolomba Health Zone
as_list	eq Wele Health Area	eq Wele Health Area					eq Bolomba Health Zone
as_list	eq Bolomba Health Area	eq Bolomba Health Area					eq Bolomba Health Zone
as_list	eq Bontole Health Area	eq Bontole Health Area					eq Ingende Health Zone
as_list	Wangata Health Area	Wangata Health Area					eq Ingende Health Zone
as_list	Makako Health Area	Makako Health Area					eq Ingende Health Zone
as_list	eq Bokatola Health Area	eq Bokatola Health Area					eq Ingende Health Zone
as_list	eq Loonga Health Area	eq Loonga Health Area					eq Ingende Health Zone
as_list	eq Bokamba Ngombe Health Area	eq Bokamba Ngombe Health Area					eq Ingende Health Zone
as_list	eq Bakandja Health Area	eq Bakandja Health Area					eq Ingende Health Zone
as_list	eq Paris Health Area	eq Paris Health Area					Makanza Health Zone
as_list	eq Lusengo Health Area	eq Lusengo Health Area					Makanza Health Zone
as_list	eq Mobeka Health Area	eq Mobeka Health Area					Makanza Health Zone
as_list	Boboka Health Area	Boboka Health Area					Makanza Health Zone
as_list	eq Bongwele Health Area	eq Bongwele Health Area					Makanza Health Zone
as_list	eq Likuba Health Area	eq Likuba Health Area					Makanza Health Zone
as_list	eq Malunza Health Area	eq Malunza Health Area					Makanza Health Zone
as_list	eq Ngendu Health Area	eq Ngendu Health Area					eq Mampoko Health Zone
as_list	Catholic Health Area	Catholic Health Area					eq Mampoko Health Zone
as_list	Botamba Health Area	Botamba Health Area					eq Mampoko Health Zone
as_list	Manyanga Health Area	Manyanga Health Area					eq Mampoko Health Zone
as_list	eq Boso-Asuka Health Area	eq Boso-Asuka Health Area					eq Mampoko Health Zone
as_list	eq Limbila Health Area	eq Limbila Health Area					eq Mampoko Health Zone
as_list	eq Ikanza Health Area	eq Ikanza Health Area					eq Mampoko Health Zone
as_list	Lohenge Health Area	Lohenge Health Area					Ntondo Health Zone
as_list	eq Nkolo Health Area	eq Nkolo Health Area					Ntondo Health Zone
as_list	eq Mokula Health Area	eq Mokula Health Area					Ntondo Health Zone
as_list	eq Botwali Health Area	eq Botwali Health Area					Ntondo Health Zone
as_list	eq Nzalekenga Health Area	eq Nzalekenga Health Area					Ntondo Health Zone
as_list	eq Lokongo Health Area	eq Lokongo Health Area					Ntondo Health Zone
as_list	hk Disanga 2 Health Area	hk Disanga 2 Health Area					HK Kambove Health Zone
as_list	hk Mpande Health Area	hk Mpande Health Area					HK Kambove Health Zone
as_list	HK Mulungwishi Health Area	HK Mulungwishi Health Area					HK Kambove Health Zone
as_list	HK Kyaba Health Area	HK Kyaba Health Area					HK Kambove Health Zone
as_list	hk Disanga 1 Health Area	hk Disanga 1 Health Area					HK Kambove Health Zone
as_list	HK Kiwewe Health Area	HK Kiwewe Health Area					HK Kambove Health Zone
as_list	hk Mukumbi Health Area	hk Mukumbi Health Area					HK Kambove Health Zone
as_list	hk Kalipopo Health Area	hk Kalipopo Health Area					hk Kikula Health Zone
as_list	HK Mafuta Health Area	HK Mafuta Health Area					hk Kikula Health Zone
as_list	HK Musumba Health Area	HK Musumba Health Area					hk Kikula Health Zone
as_list	HK Petwe Health Area	HK Petwe Health Area					hk Kikula Health Zone
as_list	HK Kanona Health Area	HK Kanona Health Area					hk Kikula Health Zone
as_list	hk Nkolomoni Health Area	hk Nkolomoni Health Area					hk Kikula Health Zone
as_list	hk Kaponona Health Area	hk Kaponona Health Area					hk Kikula Health Zone
as_list	HK Okito Health Area	HK Okito Health Area					hk Kikula Health Zone
as_list	HK Mission Health Area	HK Mission Health Area					hk Kilela Balanda Health Zone
as_list	HK Kaluwe Health Area	HK Kaluwe Health Area					hk Kilela Balanda Health Zone
as_list	hk Kamikolo Health Area	hk Kamikolo Health Area					hk Kilela Balanda Health Zone
as_list	hk Mubambe Health Area	hk Mubambe Health Area					hk Kilela Balanda Health Zone
as_list	HK Shamalenge Health Area	HK Shamalenge Health Area					hk Kilela Balanda Health Zone
as_list	HK Kikuyo Health Area	HK Kikuyo Health Area					hk Kilela Balanda Health Zone
as_list	hk Mwabesa Health Area	hk Mwabesa Health Area					hk Kilela Balanda Health Zone
as_list	HK Kapufi Health Area	HK Kapufi Health Area					Kilwa Health Zone
as_list	hk Mulinde Health Area	hk Mulinde Health Area					Kilwa Health Zone
as_list	HK Kamutrombe Health Area	HK Kamutrombe Health Area					Kilwa Health Zone
as_list	HK Kabangu Health Area	HK Kabangu Health Area					Kilwa Health Zone
as_list	hk Dikulushi Health Area	hk Dikulushi Health Area					Kilwa Health Zone
as_list	HK Kampangwe Health Area	HK Kampangwe Health Area					Kilwa Health Zone
as_list	hk Dubie Health Area	hk Dubie Health Area					Kilwa Health Zone
as_list	HK Kakinga Health Area	HK Kakinga Health Area					Kilwa Health Zone
as_list	hk Nsangwa Health Area	hk Nsangwa Health Area					hk Mufunga Sampwe Health Zone
as_list	HK Kasungami Health Area	HK Kasungami Health Area					hk Mufunga Sampwe Health Zone
as_list	hk Kalera Health Area	hk Kalera Health Area					hk Mufunga Sampwe Health Zone
as_list	HK Kimungu Health Area	HK Kimungu Health Area					hk Mufunga Sampwe Health Zone
as_list	HK Katala Health Area	HK Katala Health Area					hk Mufunga Sampwe Health Zone
as_list	HK Kapoya Health Area	HK Kapoya Health Area					hk Mufunga Sampwe Health Zone
as_list	hk Dikulwe Health Area	hk Dikulwe Health Area					hk Mufunga Sampwe Health Zone
as_list	HK Kanfwa Health Area	HK Kanfwa Health Area					hk Mufunga Sampwe Health Zone
as_list	hk Kimpulande Health Area	hk Kimpulande Health Area					HK Panda Health Zone
as_list	hk Mivuka Health Area	hk Mivuka Health Area					HK Panda Health Zone
as_list	HK Kakontwe Health Area	HK Kakontwe Health Area					HK Panda Health Zone
as_list	HK Kilima Health Area	HK Kilima Health Area					HK Panda Health Zone
as_list	HK Muchanga Health Area	HK Muchanga Health Area					HK Panda Health Zone
as_list	hk Kamilopa Health Area	hk Kamilopa Health Area					HK Panda Health Zone
as_list	HK Kiwele Health Area	HK Kiwele Health Area					HK Panda Health Zone
as_list	hl Q 82 Health Area	hl Q 82 Health Area					hl Kamina Health Zone
as_list	hl Kasanya Health Area	hl Kasanya Health Area					hl Kamina Health Zone
as_list	hl Kyabukwa Health Area	hl Kyabukwa Health Area					hl Kamina Health Zone
as_list	hl Katuba 1 Health Area	hl Katuba 1 Health Area					hl Kamina Health Zone
as_list	Busangu Health Area	Busangu Health Area					hl Kamina Health Zone
as_list	hl Katuba 2 Health Area	hl Katuba 2 Health Area					hl Kamina Health Zone
as_list	hl Katuba 4 Health Area	hl Katuba 4 Health Area					hl Kamina Health Zone
as_list	hl Luvua Health Area	hl Luvua Health Area					hl Kamina Health Zone
as_list	hl Mutoyo Health Area	hl Mutoyo Health Area					hl Kaniama Health Zone
as_list	hl Kasese Health Area	hl Kasese Health Area					hl Kaniama Health Zone
as_list	hl Banza Mpiongo Health Area	hl Banza Mpiongo Health Area					hl Kaniama Health Zone
as_list	hl Kansenji Health Area	hl Kansenji Health Area					hl Kaniama Health Zone
as_list	hl Kimpanga Health Area	hl Kimpanga Health Area					hl Kaniama Health Zone
as_list	hl Tshibamba Health Area	hl Tshibamba Health Area					hl Kaniama Health Zone
as_list	hl Maniamuna Health Area	hl Maniamuna Health Area					hl Kaniama Health Zone
as_list	hl Kamukenji Health Area	hl Kamukenji Health Area					hl Kaniama Health Zone
as_list	hl Mwadi Kayembe 2 Health Area	hl Mwadi Kayembe 2 Health Area					hl Kaniama Health Zone
as_list	hl Nkoba Health Area	hl Nkoba Health Area					hl Kayamba Health Zone
as_list	hl Kamayi Health Area	hl Kamayi Health Area					hl Kayamba Health Zone
as_list	hl Kabamba Health Area	hl Kabamba Health Area					hl Kayamba Health Zone
as_list	hl Kahako Health Area	hl Kahako Health Area					hl Kayamba Health Zone
as_list	hl Mudindwa Health Area	hl Mudindwa Health Area					hl Kayamba Health Zone
as_list	hl Kisaho Health Area	hl Kisaho Health Area					hl Kayamba Health Zone
as_list	hl Yamba Health Area	hl Yamba Health Area					hl Kayamba Health Zone
as_list	hl Anuarite Health Area	hl Anuarite Health Area					hl Kitenge Health Zone
as_list	hl Kasenga Health Area	hl Kasenga Health Area					hl Kitenge Health Zone
as_list	hl Kayombo Health Area	hl Kayombo Health Area					hl Kitenge Health Zone
as_list	hl Kabulo Kisanga Health Area	hl Kabulo Kisanga Health Area					hl Kitenge Health Zone
as_list	hl Kalungu Health Area	hl Kalungu Health Area					hl Kitenge Health Zone
as_list	hl Kaloko Health Area	hl Kaloko Health Area					hl Kitenge Health Zone
as_list	hl Kamunza Health Area	hl Kamunza Health Area					hl Kitenge Health Zone
as_list	hl Kitenge I Health Area	hl Kitenge I Health Area					hl Kitenge Health Zone
as_list	hl Fwila Health Area	hl Fwila Health Area					hl Kitenge Health Zone
as_list	hl Banza Mbuyu Health Area	hl Banza Mbuyu Health Area					hl Lwamba Health Zone
as_list	hl Kayashingo Health Area	hl Kayashingo Health Area					hl Lwamba Health Zone
as_list	hl Kalongo Health Area	hl Kalongo Health Area					hl Lwamba Health Zone
as_list	hl Kabwe Ndalewe Health Area	hl Kabwe Ndalewe Health Area					hl Lwamba Health Zone
as_list	hl Kapwasa Health Area	hl Kapwasa Health Area					hl Lwamba Health Zone
as_list	hl Kyapwa Health Area	hl Kyapwa Health Area					hl Lwamba Health Zone
as_list	hl Kanzenga Health Area	hl Kanzenga Health Area					hl Lwamba Health Zone
as_list	hl Kilumba Ngoy Health Area	hl Kilumba Ngoy Health Area					hl Lwamba Health Zone
as_list	hl Kumbula Health Area	hl Kumbula Health Area					hl Mulongo Health Zone
as_list	hl Kamudilo Health Area	hl Kamudilo Health Area					hl Mulongo Health Zone
as_list	hl Kibambo Health Area	hl Kibambo Health Area					hl Mulongo Health Zone
as_list	hl Kyabo Health Area	hl Kyabo Health Area					hl Mulongo Health Zone
as_list	hl Kiya Health Area	hl Kiya Health Area					hl Mulongo Health Zone
as_list	hl Kanunka Health Area	hl Kanunka Health Area					hl Mulongo Health Zone
as_list	hl Musumba Health Area	hl Musumba Health Area					hl Mulongo Health Zone
as_list	hl Kalume Health Area	hl Kalume Health Area					hl Mulongo Health Zone
as_list	hu Lipara Health Area	hu Lipara Health Area					Hu Aba Health Zone
as_list	hu Ataki Health Area	hu Ataki Health Area					Hu Aba Health Zone
as_list	Kitambala Health Area	Kitambala Health Area					Hu Aba Health Zone
as_list	Bele Patarua Health Area	Bele Patarua Health Area					Hu Aba Health Zone
as_list	hu Massabe Health Area	hu Massabe Health Area					Hu Aba Health Zone
as_list	hu Aba Health Area	hu Aba Health Area					Hu Aba Health Zone
as_list	Kurukwata Health Area	Kurukwata Health Area					Hu Aba Health Zone
as_list	hu Mataku Health Area	hu Mataku Health Area					hu Boma Mangbetu Health Zone
as_list	hu Bevesieni Health Area	hu Bevesieni Health Area					hu Boma Mangbetu Health Zone
as_list	hu Legu Health Area	hu Legu Health Area					hu Boma Mangbetu Health Zone
as_list	Adjangwe Health Area	Adjangwe Health Area					hu Boma Mangbetu Health Zone
as_list	hu Boma Mangbetu Health Area	hu Boma Mangbetu Health Area					hu Boma Mangbetu Health Zone
as_list	Gombe Health Area	Gombe Health Area					hu Boma Mangbetu Health Zone
as_list	Bavamasia Health Area	Bavamasia Health Area					hu Boma Mangbetu Health Zone
as_list	hu Bakote Health Area	hu Bakote Health Area					hu Dungu Health Zone
as_list	hu Musa Health Area	hu Musa Health Area					hu Dungu Health Zone
as_list	Bamokandi Health Area	Bamokandi Health Area					hu Dungu Health Zone
as_list	Biodi Health Area	Biodi Health Area					hu Dungu Health Zone
as_list	Hu Dungu Uye Health Area	Hu Dungu Uye Health Area					hu Dungu Health Zone
as_list	hu Duru Health Area	hu Duru Health Area					hu Dungu Health Zone
as_list	hu Kpekpele Health Area	hu Kpekpele Health Area					hu Dungu Health Zone
as_list	hu Kpodo Health Area	hu Kpodo Health Area					Faradje Health Zone
as_list	hu Djabir Health Area	hu Djabir Health Area					Faradje Health Zone
as_list	Katanga Health Area	Katanga Health Area					Faradje Health Zone
as_list	Doya Health Area	Doya Health Area					Faradje Health Zone
as_list	hu CECA 20 Faradje Health Area	hu CECA 20 Faradje Health Area					Faradje Health Zone
as_list	hu Koreri Health Area	hu Koreri Health Area					Faradje Health Zone
as_list	Kurukwata Health Area 1	Kurukwata Health Area					Faradje Health Zone
as_list	hu Gossamu Health Area	hu Gossamu Health Area					Isiro Health Zone
as_list	hu Djombe Health Area	hu Djombe Health Area					Isiro Health Zone
as_list	hu Makpulu Health Area	hu Makpulu Health Area					Isiro Health Zone
as_list	Mayogo Health Area	Mayogo Health Area					Isiro Health Zone
as_list	Nolua Health Area	Nolua Health Area					Isiro Health Zone
as_list	Arindru Health Area	Arindru Health Area					Isiro Health Zone
as_list	hu Mbene Health Area	hu Mbene Health Area					Isiro Health Zone
as_list	hu Budubudu Health Area	hu Budubudu Health Area					Hu Pawa Health Zone
as_list	hu Fungula Health Area	hu Fungula Health Area					Hu Pawa Health Zone
as_list	hu Ibambi Cecca 16 Health Area	hu Ibambi Cecca 16 Health Area					Hu Pawa Health Zone
as_list	Hu Pawa Health Area	Hu Pawa Health Area					Hu Pawa Health Zone
as_list	Likasi Health Area	Likasi Health Area					Hu Pawa Health Zone
as_list	hu Bavamabutu Health Area	hu Bavamabutu Health Area					Hu Pawa Health Zone
as_list	Babonde Health Area	Babonde Health Area					Hu Pawa Health Zone
as_list	it Simbiliabo Health Area	it Simbiliabo Health Area					it Bunia Health Zone
as_list	Adventist Health Area	Adventist Health Area					it Bunia Health Zone
as_list	it Bunia City Health Area	it Bunia City Health Area					it Bunia Health Zone
as_list	it Mudzi Maria Health Area	it Mudzi Maria Health Area					it Bunia Health Zone
as_list	Central Health Area	Central Health Area					it Bunia Health Zone
as_list	it Ndibakodu Health Area	it Ndibakodu Health Area					it Bunia Health Zone
as_list	it Kindia Health Area	it Kindia Health Area					it Bunia Health Zone
as_list	it Nzere Health Area	it Nzere Health Area					it Bunia Health Zone
as_list	it Dhendro Health Area	it Dhendro Health Area					it Fataki Health Zone
as_list	it Bule Health Area	it Bule Health Area					it Fataki Health Zone
as_list	Salama Health Area	Salama Health Area					it Fataki Health Zone
as_list	Ngolo Health Area	Ngolo Health Area					it Fataki Health Zone
as_list	it Jina Health Area	it Jina Health Area					it Fataki Health Zone
as_list	it Lenga Health Area	it Lenga Health Area					it Fataki Health Zone
as_list	it Fataki Health Area	it Fataki Health Area					it Fataki Health Zone
as_list	it Bilima Health Area	it Bilima Health Area					Gety Health Zone
as_list	it Maga Health Area	it Maga Health Area					Gety Health Zone
as_list	it Bukiringi Health Area	it Bukiringi Health Area					Gety Health Zone
as_list	Olongba Health Area	Olongba Health Area					Gety Health Zone
as_list	it Songolo Health Area	it Songolo Health Area					Gety Health Zone
as_list	it Aveba Health Area	it Aveba Health Area					Gety Health Zone
as_list	it Isura Health Area	it Isura Health Area					Gety Health Zone
as_list	Yangambi Health Area	Yangambi Health Area					it Laybo Health Zone
as_list	it Onzari Health Area	it Onzari Health Area					it Laybo Health Zone
as_list	Ambimaro Health Area	Ambimaro Health Area					it Laybo Health Zone
as_list	it Konga Health Area	it Konga Health Area					it Laybo Health Zone
as_list	it Laybo Health Area	it Laybo Health Area					it Laybo Health Zone
as_list	it Aloga Health Area	it Aloga Health Area					it Laybo Health Zone
as_list	it Aubha Health Area	it Aubha Health Area					it Laybo Health Zone
as_list	it Dhebu Health Area	it Dhebu Health Area					it Linga Health Zone
as_list	it DzOo Health Area	it DzOo Health Area					it Linga Health Zone
as_list	it Dheyoluts Health Area	it Dheyoluts Health Area					it Linga Health Zone
as_list	it Linga Health Area	it Linga Health Area					it Linga Health Zone
as_list	it Lokema Health Area	it Lokema Health Area					it Linga Health Zone
as_list	Keli Health Area	Keli Health Area					it Linga Health Zone
as_list	it Noga Health Area	it Noga Health Area					it Linga Health Zone
as_list	it Tchele Health Area	it Tchele Health Area					Mangala Health Zone
as_list	it Mandje Health Area	it Mandje Health Area					Mangala Health Zone
as_list	it Bbaya Health Area	it Bbaya Health Area					Mangala Health Zone
as_list	it DzNa Health Area	it DzNa Health Area					Mangala Health Zone
as_list	it Paty Health Area	it Paty Health Area					Mangala Health Zone
as_list	it Budhu Health Area	it Budhu Health Area					Mangala Health Zone
as_list	it Kpau Health Area	it Kpau Health Area					Mangala Health Zone
as_list	kc Boma town Health Area	kc Boma town Health Area					kc Boma Health Zone
as_list	Kc Kiveve Health Area	Kc Kiveve Health Area					kc Boma Health Zone
as_list	kc Buanionzi Health Area	kc Buanionzi Health Area					kc Boma Health Zone
as_list	kc Seka Mbote Health Area	kc Seka Mbote Health Area					kc Boma Health Zone
as_list	kc Kimbangu A Health Area	kc Kimbangu A Health Area					kc Boma Health Zone
as_list	kc Roundabout Health Area	kc Roundabout Health Area					kc Boma Health Zone
as_list	kc Sinai Health Area	kc Sinai Health Area					kc Boma Health Zone
as_list	kc Mpanga Health Area	kc Mpanga Health Area					kc Kimpangu Health Zone
as_list	KC Kivala Health Area	KC Kivala Health Area					kc Kimpangu Health Zone
as_list	kc Kimpangu Health Area	kc Kimpangu Health Area					kc Kimpangu Health Zone
as_list	kc Kilombo 2 Health Area	kc Kilombo 2 Health Area					kc Kimpangu Health Zone
as_list	kc Mbanza Mbata Health Area	kc Mbanza Mbata Health Area					kc Kimpangu Health Zone
as_list	kc Cité N'Sambu Health Area	kc Cité N'Sambu Health Area					kc Kimpangu Health Zone
as_list	kc Post 19 Health Area	kc Post 19 Health Area					kc Kimpangu Health Zone
as_list	kc Kimuisi Health Area	kc Kimuisi Health Area					Kc Kisantu Health Zone
as_list	Kc Kinkoko Health Area	Kc Kinkoko Health Area					Kc Kisantu Health Zone
as_list	kc Ngeba Health Area	kc Ngeba Health Area					Kc Kisantu Health Zone
as_list	kc Kilenda Health Area	kc Kilenda Health Area					Kc Kisantu Health Zone
as_list	kc Nzeza Nlandu Health Area	kc Nzeza Nlandu Health Area					Kc Kisantu Health Zone
as_list	kc Madimba Health Area	kc Madimba Health Area					Kc Kisantu Health Zone
as_list	kc Kintanu 2 Health Area	kc Kintanu 2 Health Area					Kc Kisantu Health Zone
as_list	kc Mbata Minsinga Health Area	kc Mbata Minsinga Health Area					kc Kuimba Health Zone
as_list	kc Khodo Tembe Health Area	kc Khodo Tembe Health Area					kc Kuimba Health Zone
as_list	kc Kai Tsanga Health Area	kc Kai Tsanga Health Area					kc Kuimba Health Zone
as_list	kc Kai Kuimba Health Area	kc Kai Kuimba Health Area					kc Kuimba Health Zone
as_list	kc Tsanga North Health Area	kc Tsanga North Health Area					kc Kuimba Health Zone
as_list	kc Sebo Nzobe Health Area	kc Sebo Nzobe Health Area					kc Kuimba Health Zone
as_list	kc Fundu Nzobe Health Area	kc Fundu Nzobe Health Area					kc Kuimba Health Zone
as_list	kc Yanga Health Area	kc Yanga Health Area					kc Luozi Health Zone
as_list	kc Bidi Kindamba Health Area	kc Bidi Kindamba Health Area					kc Luozi Health Zone
as_list	kc Nkundi Health Area	kc Nkundi Health Area					kc Luozi Health Zone
as_list	kc Luozi Health Area	kc Luozi Health Area					kc Luozi Health Zone
as_list	kc Bandakani Health Area	kc Bandakani Health Area					kc Luozi Health Zone
as_list	kc Muzanza Health Area	kc Muzanza Health Area					kc Luozi Health Zone
as_list	kc Kinsemi Health Area	kc Kinsemi Health Area					kc Luozi Health Zone
as_list	kc Mvuzi Health Area	kc Mvuzi Health Area					kc Matadi Health Zone
as_list	kc Soyo Luadi A Health Area	kc Soyo Luadi A Health Area					kc Matadi Health Zone
as_list	kc Military Health Area	kc Military Health Area					kc Matadi Health Zone
as_list	kc Ngadi B Health Area	kc Ngadi B Health Area					kc Matadi Health Zone
as_list	kc Hygiene A Health Area	kc Hygiene A Health Area					kc Matadi Health Zone
as_list	kc Hygiene B Health Area	kc Hygiene B Health Area					kc Matadi Health Zone
as_list	kc Makindu Health Area	kc Makindu Health Area					kc Matadi Health Zone
as_list	ke Kalunda Health Area	ke Kalunda Health Area					Bibanga Health Zone
as_list	ke Katanda 1 Health Area	ke Katanda 1 Health Area					Bibanga Health Zone
as_list	Kabala 2 Health Area	Kabala 2 Health Area					Bibanga Health Zone
as_list	Kaponji Health Area	Kaponji Health Area					Bibanga Health Zone
as_list	ke Katanda 2 Health Area	ke Katanda 2 Health Area					Bibanga Health Zone
as_list	ke Katabua Health Area	ke Katabua Health Area					Bibanga Health Zone
as_list	ke Katshiampanga Health Area	ke Katshiampanga Health Area					Bibanga Health Zone
as_list	ke Bakwa Sumba Health Area	ke Bakwa Sumba Health Area					ke Cilundu Health Zone
as_list	ke Bakwa Mpemba Health Area	ke Bakwa Mpemba Health Area					ke Cilundu Health Zone
as_list	ke Kamana Health Area	ke Kamana Health Area					ke Cilundu Health Zone
as_list	ke Buloba Health Area	ke Buloba Health Area					ke Cilundu Health Zone
as_list	ke Bakwa Kamba Health Area	ke Bakwa Kamba Health Area					ke Cilundu Health Zone
as_list	ke Luanga Health Area	ke Luanga Health Area					ke Cilundu Health Zone
as_list	ke Cilundu Health Area	ke Cilundu Health Area					ke Cilundu Health Zone
as_list	Panama Health Area	Panama Health Area					ke Citenge Health Zone
as_list	Saint Raphael Health Area	Saint Raphael Health Area					ke Citenge Health Zone
as_list	ke Market Health Area	ke Market Health Area					ke Citenge Health Zone
as_list	ke Buloba Health Area 1	ke Buloba Health Area 1					ke Citenge Health Zone
as_list	ke Lupandu Luetu Health Area	ke Lupandu Luetu Health Area					ke Citenge Health Zone
as_list	ke Ciala Health Area	ke Ciala Health Area					ke Citenge Health Zone
as_list	ke Kapindu Health Area	ke Kapindu Health Area					ke Citenge Health Zone
as_list	ke Badiadia Health Area	ke Badiadia Health Area					Lukelenge Health Zone
as_list	ke Daipn Health Area	ke Daipn Health Area					Lukelenge Health Zone
as_list	ke Lukelenge 1 Health Area	ke Lukelenge 1 Health Area					Lukelenge Health Zone
as_list	Kabongo Health Area	Kabongo Health Area					Lukelenge Health Zone
as_list	ke Kajingu Health Area	ke Kajingu Health Area					Lukelenge Health Zone
as_list	ke Bonte Health Area	ke Bonte Health Area					Lukelenge Health Zone
as_list	ke Mbinza Health Area	ke Mbinza Health Area					Lukelenge Health Zone
as_list	ke Mulenda Health Area	ke Mulenda Health Area					ke Mpokolo Health Zone
as_list	Don Bosco Health Area	Don Bosco Health Area					ke Mpokolo Health Zone
as_list	ke Ditalala Health Area	ke Ditalala Health Area					ke Mpokolo Health Zone
as_list	ke Ntoka Health Area	ke Ntoka Health Area					ke Mpokolo Health Zone
as_list	ke Katende Health Area	ke Katende Health Area					ke Mpokolo Health Zone
as_list	ke Tshimpe Health Area	ke Tshimpe Health Area					ke Mpokolo Health Zone
as_list	ke Cibombo Health Area	ke Cibombo Health Area					ke Mpokolo Health Zone
as_list	Kapiandolo Health Area	Kapiandolo Health Area					Ke Mukumbi Health Zone
as_list	ke Mines 45 Health Area	ke Mines 45 Health Area					Ke Mukumbi Health Zone
as_list	ke Bakua Mulumba Health Area	ke Bakua Mulumba Health Area					Ke Mukumbi Health Zone
as_list	Kambanga Health Area	Kambanga Health Area					Ke Mukumbi Health Zone
as_list	Kamaleka Health Area	Kamaleka Health Area					Ke Mukumbi Health Zone
as_list	ke Bakua Mbuyi Health Area	ke Bakua Mbuyi Health Area					Ke Mukumbi Health Zone
as_list	ke Bakua Bisampo Health Area	ke Bakua Bisampo Health Area					Ke Mukumbi Health Zone
as_list	kg Kasandji Health Area	kg Kasandji Health Area					kg Boko Health Zone
as_list	kg Inzioko Health Area	kg Inzioko Health Area					kg Boko Health Zone
as_list	kg Kwango Bridge Health Area	kg Kwango Bridge Health Area					kg Boko Health Zone
as_list	kg Dinga Health Area	kg Dinga Health Area					kg Boko Health Zone
as_list	kg Kenge 2 Health Area	kg Kenge 2 Health Area					kg Boko Health Zone
as_list	kg Lonzo Health Area	kg Lonzo Health Area					kg Boko Health Zone
as_list	kg Muyalala Health Area	kg Muyalala Health Area					kg Boko Health Zone
as_list	kg Mbumba Health Area	kg Mbumba Health Area					kg Feshi Health Zone
as_list	kg Maziamo Health Area	kg Maziamo Health Area					kg Feshi Health Zone
as_list	kg Kahoka Health Area	kg Kahoka Health Area					kg Feshi Health Zone
as_list	kg Utadi Health Area	kg Utadi Health Area					kg Feshi Health Zone
as_list	kg Mutsunda Health Area	kg Mutsunda Health Area					kg Feshi Health Zone
as_list	kg Kikombo Health Area	kg Kikombo Health Area					kg Feshi Health Zone
as_list	kg Feshi 2 Health Area	kg Feshi 2 Health Area					kg Feshi Health Zone
as_list	kg Lobo Health Area	kg Lobo Health Area					kg Feshi Health Zone
as_list	kg Mwendjila Health Area	kg Mwendjila Health Area					kg Kajiji Health Zone
as_list	kg Mudikalunga Health Area	kg Mudikalunga Health Area					kg Kajiji Health Zone
as_list	kg Bwana Mutombo Health Area	kg Bwana Mutombo Health Area					kg Kajiji Health Zone
as_list	kg Shambungu Health Area	kg Shambungu Health Area					kg Kajiji Health Zone
as_list	kg Muwanda Health Area	kg Muwanda Health Area					kg Kajiji Health Zone
as_list	kg Tshitoyo Health Area	kg Tshitoyo Health Area					kg Kajiji Health Zone
as_list	kg Kapinipini Health Area	kg Kapinipini Health Area					kg Kajiji Health Zone
as_list	kg Fasamba Health Area	kg Fasamba Health Area					kg Kenge Health Zone
as_list	kg Kolokoso Health Area	kg Kolokoso Health Area					kg Kenge Health Zone
as_list	kg Makiosi Health Area	kg Makiosi Health Area					kg Kenge Health Zone
as_list	kg Bangongo Health Area	kg Bangongo Health Area					kg Kenge Health Zone
as_list	kg Swa Bangu Health Area	kg Swa Bangu Health Area					kg Kenge Health Zone
as_list	kg Kimbakata Health Area	kg Kimbakata Health Area					kg Kenge Health Zone
as_list	kg Misele Health Area	kg Misele Health Area					kg Kenge Health Zone
as_list	kg Ngondi Mutombo Health Area	kg Ngondi Mutombo Health Area					kg Kenge Health Zone
as_list	kg Mukila Health Area	kg Mukila Health Area					kg Kenge Health Zone
as_list	kg Makenzi Health Area	kg Makenzi Health Area					kg Kitenda Health Zone
as_list	kg Swa kibula Health Area	kg Swa kibula Health Area					kg Kitenda Health Zone
as_list	kg Kazembe Health Area	kg Kazembe Health Area					kg Kitenda Health Zone
as_list	kg Swa Ilunga Health Area	kg Swa Ilunga Health Area					kg Kitenda Health Zone
as_list	kg Kikuti Health Area	kg Kikuti Health Area					kg Kitenda Health Zone
as_list	kg Kitenda Health Area	kg Kitenda Health Area					kg Kitenda Health Zone
as_list	kg Kimbwasa Health Area	kg Kimbwasa Health Area					kg Kitenda Health Zone
as_list	kg Mihala Health Area	kg Mihala Health Area					kg Kitenda Health Zone
as_list	kg Kahungula Health Area	kg Kahungula Health Area					kg Tembo Health Zone
as_list	kg Kapita Suka Health Area	kg Kapita Suka Health Area					kg Tembo Health Zone
as_list	kg Swamasangu Health Area	kg Swamasangu Health Area					kg Tembo Health Zone
as_list	kg Yamfu-Kilunga Health Area	kg Yamfu-Kilunga Health Area					kg Tembo Health Zone
as_list	kg Suayamfu Health Area	kg Suayamfu Health Area					kg Tembo Health Zone
as_list	kg Kisadi Health Area	kg Kisadi Health Area					kg Tembo Health Zone
as_list	kg Ngundu Mayala Health Area	kg Ngundu Mayala Health Area					kg Tembo Health Zone
as_list	kl Nteti Health Area	kl Nteti Health Area					Bagata Health Zone
as_list	Kibimi Health Area	Kibimi Health Area					Bagata Health Zone
as_list	kl Moterensiene Health Area	kl Moterensiene Health Area					Bagata Health Zone
as_list	kl Lukuey Health Area	kl Lukuey Health Area					Bagata Health Zone
as_list	Bangumi Health Area	Bangumi Health Area					Bagata Health Zone
as_list	kl Sampier Health Area	kl Sampier Health Area					Bagata Health Zone
as_list	kl Mbaya Lareme Health Area	kl Mbaya Lareme Health Area					Bagata Health Zone
as_list	kl Ndana Health Area	kl Ndana Health Area					Bagata Health Zone
as_list	Blind Kimvuka Health Area	Blind Kimvuka Health Area					Bandundu Health Zone
as_list	kl Malebo Health Area	kl Malebo Health Area					Bandundu Health Zone
as_list	kl Lumbu Health Area	kl Lumbu Health Area					Bandundu Health Zone
as_list	kl Mushie Pentane Health Area	kl Mushie Pentane Health Area					Bandundu Health Zone
as_list	kl CEBU BDD Health Area	kl CEBU BDD Health Area					Bandundu Health Zone
as_list	kl Bondeko Health Area	kl Bondeko Health Area					Bandundu Health Zone
as_list	kl Trois Rivières Health Area	kl Trois Rivières Health Area					Bandundu Health Zone
as_list	kl Ibole Health Area	kl Ibole Health Area					Bandundu Health Zone
as_list	kl Mubolo Health Area	kl Mubolo Health Area					kl Djuma Health Zone
as_list	Mayoko Health Area	Mayoko Health Area					kl Djuma Health Zone
as_list	kl Sala Health Area	kl Sala Health Area					kl Djuma Health Zone
as_list	Lubidi Health Area	Lubidi Health Area					kl Djuma Health Zone
as_list	Kimbangula Health Area	Kimbangula Health Area					kl Djuma Health Zone
as_list	kl Eto Mubini Health Area	kl Eto Mubini Health Area					kl Djuma Health Zone
as_list	kl Dwe Nganga Health Area	kl Dwe Nganga Health Area					kl Djuma Health Zone
as_list	kl Bwaniangi Health Area	kl Bwaniangi Health Area					kl Djuma Health Zone
as_list	kl Kimpini Health Area	kl Kimpini Health Area					kl Djuma Health Zone
as_list	kl Miah Health Area	kl Miah Health Area					kl Djuma Health Zone
as_list	Kazamba Health Area	Kazamba Health Area					Kingandu Health Zone
as_list	Kimbimbi Health Area	Kimbimbi Health Area					Kingandu Health Zone
as_list	Kipande Health Area	Kipande Health Area					Kingandu Health Zone
as_list	Kasanza Health Area	Kasanza Health Area					Kingandu Health Zone
as_list	kl Sese Kidinda Health Area	kl Sese Kidinda Health Area					Kingandu Health Zone
as_list	kl Kulu Health Area	kl Kulu Health Area					Kingandu Health Zone
as_list	kl Kahela Health Area	kl Kahela Health Area					Kingandu Health Zone
as_list	Longwama Health Area	Longwama Health Area					kl Mokala Health Zone
as_list	kl Bikoko Health Area	kl Bikoko Health Area					kl Mokala Health Zone
as_list	kl Sedzo Health Area	kl Sedzo Health Area					kl Mokala Health Zone
as_list	kl Panu Sumbu Health Area	kl Panu Sumbu Health Area					kl Mokala Health Zone
as_list	Kinkono Health Area	Kinkono Health Area					kl Mokala Health Zone
as_list	kl Kalo Health Area	kl Kalo Health Area					kl Mokala Health Zone
as_list	kl Mobini Health Area	kl Mobini Health Area					kl Mokala Health Zone
as_list	kl Ngaliema Health Area	kl Ngaliema Health Area					kl Mokala Health Zone
as_list	kl Nianga Health Area	kl Nianga Health Area					kl Mokala Health Zone
as_list	kl Panu 3 Health Area	kl Panu 3 Health Area					kl Mokala Health Zone
as_list	kl Pay Health Area	kl Pay Health Area					kl Pay Kongila Health Zone
as_list	kl Minzimba Health Area	kl Minzimba Health Area					kl Pay Kongila Health Zone
as_list	Kingola Health Area	Kingola Health Area					kl Pay Kongila Health Zone
as_list	kl Mungulu Health Area	kl Mungulu Health Area					kl Pay Kongila Health Zone
as_list	kl Kipalanka Health Area	kl Kipalanka Health Area					kl Pay Kongila Health Zone
as_list	Kimbekele Health Area	Kimbekele Health Area					kl Pay Kongila Health Zone
as_list	Kimbwalu Health Area	Kimbwalu Health Area					kl Pay Kongila Health Zone
as_list	kl Kola Health Area	kl Kola Health Area					kl Pay Kongila Health Zone
as_list	kn Lingwala Health Area	kn Lingwala Health Area					kn Bandalungwa Health Zone
as_list	kn Makelele Health Area	kn Makelele Health Area					kn Bandalungwa Health Zone
as_list	kn Bisengo Health Area	kn Bisengo Health Area					kn Bandalungwa Health Zone
as_list	kn Adoula Health Area	kn Adoula Health Area					kn Bandalungwa Health Zone
as_list	kn Lumumba Health Area	kn Lumumba Health Area					kn Bandalungwa Health Zone
as_list	kn Lubudi North Health Area	kn Lubudi North Health Area					kn Bandalungwa Health Zone
as_list	kn Lubudi South Health Area	kn Lubudi South Health Area					kn Bandalungwa Health Zone
as_list	kn Immocongo Health Area	kn Immocongo Health Area					kn Kalamu 1 Health Zone
as_list	kn Matonge 1 Health Area	kn Matonge 1 Health Area					kn Kalamu 1 Health Zone
as_list	Kimbangu Health Area 1	Kimbangu Health Area 1					kn Kalamu 1 Health Zone
as_list	Kimbangu Health Area 3	Kimbangu Health Area 3					kn Kalamu 1 Health Zone
as_list	kn Kauka 2 Health Area	kn Kauka 2 Health Area					kn Kalamu 1 Health Zone
as_list	kn Matonge 3 Health Area	kn Matonge 3 Health Area					kn Kalamu 1 Health Zone
as_list	kn Kauka 1 Health Area	kn Kauka 1 Health Area					kn Kalamu 1 Health Zone
as_list	kn Commercial Health Area	kn Commercial Health Area					kn Lemba Health Zone
as_list	kn Gombele Health Area	kn Gombele Health Area					kn Lemba Health Zone
as_list	kn Salongo Health Area	kn Salongo Health Area					kn Lemba Health Zone
as_list	kn The Voice of the People Health Area	kn The Voice of the People Health Area					Lingwala Health Zone
as_list	kn Wenze Health Area	kn Wenze Health Area					Lingwala Health Zone
as_list	kn June Thirty Health Area	kn June Thirty Health Area					Lingwala Health Zone
as_list	kn Singa Mopepe Health Area	kn Singa Mopepe Health Area					Lingwala Health Zone
as_list	kn Pakadjuma Health Area	kn Pakadjuma Health Area					Lingwala Health Zone
as_list	kn Cencei Health Area	kn Cencei Health Area					Lingwala Health Zone
as_list	kn Ngunda Lokombe Health Area	kn Ngunda Lokombe Health Area					Lingwala Health Zone
as_list	kn Masanga Mbila Health Area	kn Masanga Mbila Health Area					kn Mount Ngafula 1 Health Zone
as_list	Kn Pumbu Health Area	Kn Pumbu Health Area					kn Mount Ngafula 1 Health Zone
as_list	kn Kimwenza Rural Health Area	kn Kimwenza Rural Health Area					kn Mount Ngafula 1 Health Zone
as_list	kn Matadi Mayo Health Area	kn Matadi Mayo Health Area					kn Mount Ngafula 1 Health Zone
as_list	Kimbondo Health Area	Kimbondo Health Area					kn Mount Ngafula 1 Health Zone
as_list	kn Mama Yemo Health Area	kn Mama Yemo Health Area					kn Mount Ngafula 1 Health Zone
as_list	kn Mitendi Health Area	kn Mitendi Health Area					kn Mount Ngafula 1 Health Zone
as_list	kn Manionzi Health Area	kn Manionzi Health Area					kn Mount Ngafula 1 Health Zone
as_list	kn District 6 Health Area	kn District 6 Health Area					kn Ndjili Health Zone
as_list	kn District 10 Health Area	kn District 10 Health Area					kn Ndjili Health Zone
as_list	kn District 3 Health Area	kn District 3 Health Area					kn Ndjili Health Zone
as_list	kn District 2 Health Area	kn District 2 Health Area					kn Ndjili Health Zone
as_list	kn District 12 Health Area	kn District 12 Health Area					kn Ndjili Health Zone
as_list	kn District 13 A Health Area	kn District 13 A Health Area					kn Ndjili Health Zone
as_list	kn District 9 Health Area	kn District 9 Health Area					kn Ndjili Health Zone
as_list	Kindobo Health Area	Kindobo Health Area					kn Nsele Health Zone
as_list	kn Bahumbu 2 Health Area	kn Bahumbu 2 Health Area					kn Nsele Health Zone
as_list	kn Buma Health Area	kn Buma Health Area					kn Nsele Health Zone
as_list	kn Badara Health Area	kn Badara Health Area					kn Nsele Health Zone
as_list	kn Mpasa 1 Health Area	kn Mpasa 1 Health Area					kn Nsele Health Zone
as_list	Mikondo Health Area	Mikondo Health Area					kn Nsele Health Zone
as_list	kn Nsele Health Area	kn Nsele Health Area					kn Nsele Health Zone
as_list	kr Tshikele Health Area	kr Tshikele Health Area					kr Bunkonde Health Zone
as_list	kr Ntambue Lomami Health Area	kr Ntambue Lomami Health Area					kr Bunkonde Health Zone
as_list	kr Dibanda Health Area	kr Dibanda Health Area					kr Bunkonde Health Zone
as_list	kr Kajangayi Health Area	kr Kajangayi Health Area					kr Bunkonde Health Zone
as_list	kr Mbumba Health Area	kr Mbumba Health Area					kr Bunkonde Health Zone
as_list	kr Bunkonde Health Area	kr Bunkonde Health Area					kr Bunkonde Health Zone
as_list	kr Tshingana Health Area	kr Tshingana Health Area					kr Bunkonde Health Zone
as_list	kr Dibaya Health Area	kr Dibaya Health Area					kr Dibaya Health Zone
as_list	kr Mukua Dianga Health Area	kr Mukua Dianga Health Area					kr Dibaya Health Zone
as_list	kr Tshilela Health Area	kr Tshilela Health Area					kr Dibaya Health Zone
as_list	kr Kamboke Health Area	kr Kamboke Health Area					kr Dibaya Health Zone
as_list	kr Kaulu Health Area	kr Kaulu Health Area					kr Dibaya Health Zone
as_list	kr Tshidimba Health Area	kr Tshidimba Health Area					kr Dibaya Health Zone
as_list	kr Lumbudi Health Area	kr Lumbudi Health Area					kr Dibaya Health Zone
as_list	kr Muamba Mbuyi Health Area	kr Muamba Mbuyi Health Area					kr Kananga Health Zone
as_list	kr Kawele Health Area	kr Kawele Health Area					kr Kananga Health Zone
as_list	kr Apollo Health Area	kr Apollo Health Area					kr Kananga Health Zone
as_list	kr Tubuluku Health Area	kr Tubuluku Health Area					kr Kananga Health Zone
as_list	kr Bikuku Health Area	kr Bikuku Health Area					kr Kananga Health Zone
as_list	kr Biancky 2 Health Area	kr Biancky 2 Health Area					kr Kananga Health Zone
as_list	kr Mudimbi Health Area	kr Mudimbi Health Area					kr Kananga Health Zone
as_list	kr Hospital Health Area	kr Hospital Health Area					kr Kananga Health Zone
as_list	kr Isasa Health Area	kr Isasa Health Area					kr Luiza Health Zone
as_list	kr Community Health Area	kr Community Health Area					kr Luiza Health Zone
as_list	kr Lusengu Health Area	kr Lusengu Health Area					kr Luiza Health Zone
as_list	kr Kasonga Health Area	kr Kasonga Health Area					kr Luiza Health Zone
as_list	kr Kandakanda Health Area	kr Kandakanda Health Area					kr Luiza Health Zone
as_list	kr Kakamba Health Area	kr Kakamba Health Area					kr Luiza Health Zone
as_list	kr Kitoko Health Area	kr Kitoko Health Area					kr Luiza Health Zone
as_list	kr Disaya Health Area	kr Disaya Health Area					kr Mutoto Health Zone
as_list	kr Dilembue 2 Health Area	kr Dilembue 2 Health Area					kr Mutoto Health Zone
as_list	kr Luyamba Health Area	kr Luyamba Health Area					kr Mutoto Health Zone
as_list	kr Mbondo Health Area	kr Mbondo Health Area					kr Mutoto Health Zone
as_list	kr Ntambue Kayembe Health Area	kr Ntambue Kayembe Health Area					kr Mutoto Health Zone
as_list	kr Dilembue 1 Health Area	kr Dilembue 1 Health Area					kr Mutoto Health Zone
as_list	kr Tshinanga Health Area	kr Tshinanga Health Area					kr Mutoto Health Zone
as_list	kr Kamuandu Health Area	kr Kamuandu Health Area					kr Tshikula Health Zone
as_list	kr Yamba Yamba Health Area	kr Yamba Yamba Health Area					kr Tshikula Health Zone
as_list	kr Tshikula Health Area	kr Tshikula Health Area					kr Tshikula Health Zone
as_list	kr Mubikayi Health Area	kr Mubikayi Health Area					kr Tshikula Health Zone
as_list	kr Mbuanya Health Area	kr Mbuanya Health Area					kr Tshikula Health Zone
as_list	kr Bitanda Kakunda Health Area	kr Bitanda Kakunda Health Area					kr Tshikula Health Zone
as_list	kr Nkufulu Health Area	kr Nkufulu Health Area					kr Tshikula Health Zone
as_list	ks Kanyunyu Health Area	ks Kanyunyu Health Area					ks Banga Lubaka Health Zone
as_list	ks Mbondjare Health Area	ks Mbondjare Health Area					ks Banga Lubaka Health Zone
as_list	ks Vatican Health Area	ks Vatican Health Area					ks Banga Lubaka Health Zone
as_list	ks Pungu 2 Health Area	ks Pungu 2 Health Area					ks Banga Lubaka Health Zone
as_list	ks Ipunda Health Area	ks Ipunda Health Area					ks Banga Lubaka Health Zone
as_list	ks Mamanya Health Area	ks Mamanya Health Area					ks Banga Lubaka Health Zone
as_list	ks Biponga Health Area	ks Biponga Health Area					ks Banga Lubaka Health Zone
as_list	ks Nkongo Health Area	ks Nkongo Health Area					ks Dekese Health Zone
as_list	ks Yoso Health Area	ks Yoso Health Area					ks Dekese Health Zone
as_list	ks Djombo Health Area	ks Djombo Health Area					ks Dekese Health Zone
as_list	ks Bambakfu Health Area	ks Bambakfu Health Area					ks Dekese Health Zone
as_list	ks Bongondo Health Area	ks Bongondo Health Area					ks Dekese Health Zone
as_list	ks Isandja Health Area	ks Isandja Health Area					ks Dekese Health Zone
as_list	ks Mbanga South Health Area	ks Mbanga South Health Area					ks Dekese Health Zone
as_list	ks Bololo Health Area	ks Bololo Health Area					ks Dekese Health Zone
as_list	ks Kanzala Health Area	ks Kanzala Health Area					ks Kanzala Health Zone
as_list	ks Salambote Health Area	ks Salambote Health Area					ks Kanzala Health Zone
as_list	ks Mutshi Health Area	ks Mutshi Health Area					ks Kanzala Health Zone
as_list	ks Lunyanya Health Area	ks Lunyanya Health Area					ks Kanzala Health Zone
as_list	ks Stage 1 Health Area	ks Stage 1 Health Area					ks Kanzala Health Zone
as_list	ks Clinic Health Area	ks Clinic Health Area					ks Kanzala Health Zone
as_list	ks Kankala Health Area	ks Kankala Health Area					ks Kanzala Health Zone
as_list	ks Bongo 2 Health Area	ks Bongo 2 Health Area					ks Mushenge Health Zone
as_list	ks Nono Health Area	ks Nono Health Area					ks Mushenge Health Zone
as_list	ks Domiongo 2 Health Area	ks Domiongo 2 Health Area					ks Mushenge Health Zone
as_list	ks Ngoto Health Area	ks Ngoto Health Area					ks Mushenge Health Zone
as_list	ks Kabwe Health Area	ks Kabwe Health Area					ks Mushenge Health Zone
as_list	ks Shongamba Health Area	ks Shongamba Health Area					ks Mushenge Health Zone
as_list	ks Mbima Health Area	ks Mbima Health Area					ks Mushenge Health Zone
as_list	ks Mwentshi Health Area	ks Mwentshi Health Area					ks Mushenge Health Zone
as_list	ks Muanyika Health Area	ks Muanyika Health Area					ks Mweka Health Zone
as_list	ks Mweka 1 Health Area	ks Mweka 1 Health Area					ks Mweka Health Zone
as_list	ks Mweka 3 Health Area	ks Mweka 3 Health Area					ks Mweka Health Zone
as_list	ks Lubanga Health Area	ks Lubanga Health Area					ks Mweka Health Zone
as_list	ks Ishamandongo Health Area	ks Ishamandongo Health Area					ks Mweka Health Zone
as_list	ks Bulangu Tshimbulu Health Area	ks Bulangu Tshimbulu Health Area					ks Mweka Health Zone
as_list	ks Ifaf Health Area	ks Ifaf Health Area					ks Mweka Health Zone
as_list	ks Benansamba Health Area	ks Benansamba Health Area					ks Mweka Health Zone
as_list	ks Pilot Health Area	ks Pilot Health Area					ks Mweka Health Zone
as_list	ks CEDIMET CDR	ks CEDIMET CDR					ks Tshikapa Health Zone
as_list	ks Tshisele Health Area	ks Tshisele Health Area					ks Tshikapa Health Zone
as_list	ks Kabikabi Health Area	ks Kabikabi Health Area					ks Tshikapa Health Zone
as_list	ks Ngombe Health Area	ks Ngombe Health Area					ks Tshikapa Health Zone
as_list	ks Matshibola Health Area	ks Matshibola Health Area					ks Tshikapa Health Zone
as_list	ks Malongo Health Area	ks Malongo Health Area					ks Tshikapa Health Zone
as_list	ks Katshongo Health Area	ks Katshongo Health Area					ks Tshikapa Health Zone
as_list	ks Bakuba Health Area	ks Bakuba Health Area					ks Tshikapa Health Zone
as_list	Musonoie Health Area	Musonoie Health Area					Dilala Health Zone
as_list	ll Dilende Health Area	ll Dilende Health Area					Dilala Health Zone
as_list	Hewa Bora 2 Health Area	Hewa Bora 2 Health Area					Dilala Health Zone
as_list	Luilu Health Area	Luilu Health Area					Dilala Health Zone
as_list	Kapata Health Area	Kapata Health Area					Dilala Health Zone
as_list	Umoja Health Area	Umoja Health Area					Dilala Health Zone
as_list	Noa Health Area	Noa Health Area					Dilala Health Zone
as_list	Mwashi Health Area	Mwashi Health Area					Dilolo Health Zone
as_list	Mwasamba Health Area	Mwasamba Health Area					Dilolo Health Zone
as_list	Muzembamino Health Area	Muzembamino Health Area					Dilolo Health Zone
as_list	Satshata Health Area	Satshata Health Area					Dilolo Health Zone
as_list	Mafunda-Kasai Health Area	Mafunda-Kasai Health Area					Dilolo Health Zone
as_list	Mangoa Health Area	Mangoa Health Area					Dilolo Health Zone
as_list	Dilolo Station Health Area	Dilolo Station Health Area					Dilolo Health Zone
as_list	Tshipoyi Health Area	Tshipoyi Health Area					Dilolo Health Zone
as_list	Ngongo Health Area	Ngongo Health Area					Kafakumba Health Zone
as_list	Sangatshila Health Area	Sangatshila Health Area					Kafakumba Health Zone
as_list	ll Kayembe Mukulu Health Area	ll Kayembe Mukulu Health Area					Kafakumba Health Zone
as_list	Mbangu Health Area	Mbangu Health Area					Kafakumba Health Zone
as_list	Kalamboji Health Area	Kalamboji Health Area					Kafakumba Health Zone
as_list	Diyamba 2 Health Area	Diyamba 2 Health Area					Kafakumba Health Zone
as_list	Satshipanga Health Area	Satshipanga Health Area					Kafakumba Health Zone
as_list	ll Kanzenze Health Area	ll Kanzenze Health Area					ll Kanzenze Health Zone
as_list	Tshala 1 Health Area	Tshala 1 Health Area					ll Kanzenze Health Zone
as_list	Inga Health Area	Inga Health Area					ll Kanzenze Health Zone
as_list	Musokantanda Health Area	Musokantanda Health Area					ll Kanzenze Health Zone
as_list	Walemba Health Area	Walemba Health Area					ll Kanzenze Health Zone
as_list	Tshamundenda 1 Health Area	Tshamundenda 1 Health Area					ll Kanzenze Health Zone
as_list	Wakipinji Health Area	Wakipinji Health Area					ll Kanzenze Health Zone
as_list	Lualaba Station Health Area	Lualaba Station Health Area					Lualaba Health Zone
as_list	Kalutenge Health Area	Kalutenge Health Area					Lualaba Health Zone
as_list	Mangamanga Health Area	Mangamanga Health Area					Lualaba Health Zone
as_list	Mupanja Health Area	Mupanja Health Area					Lualaba Health Zone
as_list	Sakaloji Health Area	Sakaloji Health Area					Lualaba Health Zone
as_list	Katapula Health Area	Katapula Health Area					Lualaba Health Zone
as_list	Mwanfwe Health Area	Mwanfwe Health Area					Lualaba Health Zone
as_list	Lufupa Health Area	Lufupa Health Area					Mutshatsha Health Zone
as_list	Samujinga Health Area	Samujinga Health Area					Mutshatsha Health Zone
as_list	ll Mutshatsha 2 Health Area	ll Mutshatsha 2 Health Area					Mutshatsha Health Zone
as_list	Kazovu Health Area	Kazovu Health Area					Mutshatsha Health Zone
as_list	Maisha Health Area	Maisha Health Area					Mutshatsha Health Zone
as_list	Yanva Health Area	Yanva Health Area					Mutshatsha Health Zone
as_list	Kaleji Health Area	Kaleji Health Area					Mutshatsha Health Zone
as_list	lm Mbao Lubimbi Health Area	lm Mbao Lubimbi Health Area					lm Kalambayi Kabanga Health Zone
as_list	lm Kande Health Area	lm Kande Health Area					lm Kalambayi Kabanga Health Zone
as_list	Lulenga Health Area	Lulenga Health Area					lm Kalambayi Kabanga Health Zone
as_list	Kasandwe Health Area	Kasandwe Health Area					lm Kalambayi Kabanga Health Zone
as_list	lm Kabala 1 Health Area	lm Kabala 1 Health Area					lm Kalambayi Kabanga Health Zone
as_list	lm Bajila Membele Health Area	lm Bajila Membele Health Area					lm Kalambayi Kabanga Health Zone
as_list	lm Kabongo Wa Ncila Health Area	lm Kabongo Wa Ncila Health Area					lm Kalambayi Kabanga Health Zone
as_list	lm Kele Health Area	lm Kele Health Area					Kamiji Health Zone
as_list	lm Kamiji Health Area	lm Kamiji Health Area					Kamiji Health Zone
as_list	lm Lubi Health Area	lm Lubi Health Area					Kamiji Health Zone
as_list	lm Cipuka Health Area	lm Cipuka Health Area					Kamiji Health Zone
as_list	lm Miketa Health Area	lm Miketa Health Area					Kamiji Health Zone
as_list	Kasanga Health Area	Kasanga Health Area					Kamiji Health Zone
as_list	Katongo Health Area	Katongo Health Area					Kamiji Health Zone
as_list	lm Nyoka Health Area	lm Nyoka Health Area					Kamiji Health Zone
as_list	lm Maloba Health Area	lm Maloba Health Area					Lubao Health Zone
as_list	lm Sangwa Health Area	lm Sangwa Health Area					Lubao Health Zone
as_list	Kisengwa Health Area	Kisengwa Health Area					Lubao Health Zone
as_list	lm Yemba Health Area	lm Yemba Health Area					Lubao Health Zone
as_list	Lumumba Health Area	Lumumba Health Area					Lubao Health Zone
as_list	lm Kabao Health Area	lm Kabao Health Area					Lubao Health Zone
as_list	lm Kamueno Health Area	lm Kamueno Health Area					Lubao Health Zone
as_list	Kengie Health Area	Kengie Health Area					lm Ludimbi Lukula Health Zone
as_list	lm Mukomayi Health Area	lm Mukomayi Health Area					lm Ludimbi Lukula Health Zone
as_list	lm Bakile Health Area	lm Bakile Health Area					lm Ludimbi Lukula Health Zone
as_list	lm Miombe Muavi Health Area	lm Miombe Muavi Health Area					lm Ludimbi Lukula Health Zone
as_list	lm Bashimikie Health Area	lm Bashimikie Health Area					lm Ludimbi Lukula Health Zone
as_list	lm Luanga Etambayi Health Area	lm Luanga Etambayi Health Area					lm Ludimbi Lukula Health Zone
as_list	lm Kifuenkiese 1 Health Area	lm Kifuenkiese 1 Health Area					lm Ludimbi Lukula Health Zone
as_list	lm Ilengele Health Area	lm Ilengele Health Area					Luputa Health Zone
as_list	lm Kombo Health Area	lm Kombo Health Area					Luputa Health Zone
as_list	lm Tshilonda Health Area	lm Tshilonda Health Area					Luputa Health Zone
as_list	lm Congo Health Area	lm Congo Health Area					Luputa Health Zone
as_list	lm Katshia Health Area	lm Katshia Health Area					Luputa Health Zone
as_list	lm Kankinda Health Area	lm Kankinda Health Area					Luputa Health Zone
as_list	lm Baseka Health Area	lm Baseka Health Area					Luputa Health Zone
as_list	Masonzo Health Area	Masonzo Health Area					Luputa Health Zone
as_list	lm Tshiabobo Health Area	lm Tshiabobo Health Area					Luputa Health Zone
as_list	lm Two Hills Health Area	lm Two Hills Health Area					lm Mweneditu Health Zone
as_list	lm Matobo Health Area	lm Matobo Health Area					lm Mweneditu Health Zone
as_list	lm Regideso Health Area	lm Regideso Health Area					lm Mweneditu Health Zone
as_list	lm Lukole Health Area	lm Lukole Health Area					lm Mweneditu Health Zone
as_list	lm Kalubeya Health Area	lm Kalubeya Health Area					lm Mweneditu Health Zone
as_list	lm Cinsihnji Health Area	lm Cinsihnji Health Area					lm Mweneditu Health Zone
as_list	lm Musadi Health Area	lm Musadi Health Area					lm Mweneditu Health Zone
as_list	lm Kanda Kanda Health Area	lm Kanda Kanda Health Area					lm Mweneditu Health Zone
as_list	md Boyambola Health Area	md Boyambola Health Area					Bolobo Health Zone
as_list	md Lebo Health Area	md Lebo Health Area					Bolobo Health Zone
as_list	md Mantuka Health Area	md Mantuka Health Area					Bolobo Health Zone
as_list	md Mompulenge Health Area	md Mompulenge Health Area					Bolobo Health Zone
as_list	md Tshumbiri Health Area	md Tshumbiri Health Area					Bolobo Health Zone
as_list	md Mokele Health Area	md Mokele Health Area					Bolobo Health Zone
as_list	md Nkoo Health Area	md Nkoo Health Area					Bolobo Health Zone
as_list	md Ndwa Bateke Health Area	md Ndwa Bateke Health Area					Bolobo Health Zone
as_list	Kilima Health Area	Kilima Health Area					md Bosobe Health Zone
as_list	md Enkutu Health Area	md Enkutu Health Area					md Bosobe Health Zone
as_list	md Tampiete Health Area	md Tampiete Health Area					md Bosobe Health Zone
as_list	md Ikwelesa Health Area	md Ikwelesa Health Area					md Bosobe Health Zone
as_list	md Mpanda Lukeni Health Area	md Mpanda Lukeni Health Area					md Bosobe Health Zone
as_list	Likwangola Health Area	Likwangola Health Area					md Bosobe Health Zone
as_list	md Selekoko Health Area	md Selekoko Health Area					md Bosobe Health Zone
as_list	md Mbelo Health Area	md Mbelo Health Area					md Inongo Health Zone
as_list	Mombokonda Health Area	Mombokonda Health Area					md Inongo Health Zone
as_list	md Boliyangwa Health Area	md Boliyangwa Health Area					md Inongo Health Zone
as_list	md Mpolo Health Area	md Mpolo Health Area					md Inongo Health Zone
as_list	md Isongo Health Area	md Isongo Health Area					md Inongo Health Zone
as_list	Belembe Health Area	Belembe Health Area					md Inongo Health Zone
as_list	md Beengo Health Area	md Beengo Health Area					md Inongo Health Zone
as_list	md Ibeke Bolia Health Area	md Ibeke Bolia Health Area					md Inongo Health Zone
as_list	md Nsaw Health Area	md Nsaw Health Area					md Inongo Health Zone
as_list	Likwangola Health Area 1	Likwangola Health Area 1					md Inongo Health Zone
as_list	md Bosawu Health Area	md Bosawu Health Area					Kiri Health Zone
as_list	md Ebanza Health Area	md Ebanza Health Area					Kiri Health Zone
as_list	md Beronge Health Area	md Beronge Health Area					Kiri Health Zone
as_list	md Ireko Health Area	md Ireko Health Area					Kiri Health Zone
as_list	md Nkile Health Area	md Nkile Health Area					Kiri Health Zone
as_list	Mbetenkoy Health Area	Mbetenkoy Health Area					Kiri Health Zone
as_list	md Bolongoweti Health Area	md Bolongoweti Health Area					Kiri Health Zone
as_list	md Baambe Health Area	md Baambe Health Area					Kiri Health Zone
as_list	md Mipale Health Area	md Mipale Health Area					md Ntandembelo Health Zone
as_list	md Ikonya Health Area	md Ikonya Health Area					md Ntandembelo Health Zone
as_list	md Ibanda Health Area	md Ibanda Health Area					md Ntandembelo Health Zone
as_list	md Epokenkaso Health Area	md Epokenkaso Health Area					md Ntandembelo Health Zone
as_list	md Misilo Health Area	md Misilo Health Area					md Ntandembelo Health Zone
as_list	md Bokoli Health Area	md Bokoli Health Area					md Ntandembelo Health Zone
as_list	md Nsondia Health Area	md Nsondia Health Area					md Ntandembelo Health Zone
as_list	md Ntanda 2 Health Area	md Ntanda 2 Health Area					md Ntandembelo Health Zone
as_list	Luanema Health Area	Luanema Health Area					Oshwe Health Zone
as_list	md Bena Bendi Health Area	md Bena Bendi Health Area					Oshwe Health Zone
as_list	md Ekwayolo Health Area	md Ekwayolo Health Area					Oshwe Health Zone
as_list	md Iyenga Health Area	md Iyenga Health Area					Oshwe Health Zone
as_list	md Nkole Nkema Health Area	md Nkole Nkema Health Area					Oshwe Health Zone
as_list	md Bombole Health Area	md Bombole Health Area					Oshwe Health Zone
as_list	Nongenzale Health Area	Nongenzale Health Area					Oshwe Health Zone
as_list	Malembe Health Area	Malembe Health Area					Oshwe Health Zone
as_list	md Ilanga Nkole Health Area	md Ilanga Nkole Health Area					Oshwe Health Zone
as_list	mg Ebambe Health Area	mg Ebambe Health Area					mg Boso Manzi Health Zone
as_list	mg Makao Health Area	mg Makao Health Area					mg Boso Manzi Health Zone
as_list	mg Monzelenge Health Area	mg Monzelenge Health Area					mg Boso Manzi Health Zone
as_list	mg Mongili Health Area	mg Mongili Health Area					mg Boso Manzi Health Zone
as_list	mg Bokapo Health Area	mg Bokapo Health Area					mg Boso Manzi Health Zone
as_list	mg Bomoye Health Area	mg Bomoye Health Area					mg Boso Manzi Health Zone
as_list	mg Boso Manzi Health Area	mg Boso Manzi Health Area					mg Boso Manzi Health Zone
as_list	mg Boso Mane Health Area	mg Boso Mane Health Area					mg Boso Mondanda Health Zone
as_list	mg Boso Melo Health Area	mg Boso Melo Health Area					mg Boso Mondanda Health Zone
as_list	mg Bokatolaka Health Area	mg Bokatolaka Health Area					mg Boso Mondanda Health Zone
as_list	mg Boso Dzengo Health Area	mg Boso Dzengo Health Area					mg Boso Mondanda Health Zone
as_list	mg Boso Ngomu Health Area	mg Boso Ngomu Health Area					mg Boso Mondanda Health Zone
as_list	mg Likpanda Health Area	mg Likpanda Health Area					mg Boso Mondanda Health Zone
as_list	mg Boso Kwanga Health Area	mg Boso Kwanga Health Area					mg Boso Mondanda Health Zone
as_list	mg Yakata 2 Health Area	mg Yakata 2 Health Area					mg Bosondjo Health Zone
as_list	mg Dobo Rive Health Area	mg Dobo Rive Health Area					mg Bosondjo Health Zone
as_list	mg Bodala Health Area	mg Bodala Health Area					mg Bosondjo Health Zone
as_list	mg Mbimbi Health Area	mg Mbimbi Health Area					mg Bosondjo Health Zone
as_list	mg Lokalema Health Area	mg Lokalema Health Area					mg Bosondjo Health Zone
as_list	mg Boso Pelindo Health Area	mg Boso Pelindo Health Area					mg Bosondjo Health Zone
as_list	mg Yamongili Health Area	mg Yamongili Health Area					mg Bosondjo Health Zone
as_list	mg Bakota Health Area	mg Bakota Health Area					mg Bosondjo Health Zone
as_list	mg Makomu Health Area	mg Makomu Health Area					mg Lisala Health Zone
as_list	mg Telema Health Area	mg Telema Health Area					mg Lisala Health Zone
as_list	mg Upoto Health Area	mg Upoto Health Area					mg Lisala Health Zone
as_list	mg Bokondola Health Area	mg Bokondola Health Area					mg Lisala Health Zone
as_list	mg Bosamboda Health Area	mg Bosamboda Health Area					mg Lisala Health Zone
as_list	mg Kaba Health Area	mg Kaba Health Area					mg Lisala Health Zone
as_list	mg Mboo Health Area	mg Mboo Health Area					mg Lisala Health Zone
as_list	mg Health Area Antenna	mg Health Area Antenna					mg Lisala Health Zone
as_list	mg Ngale Health Area	mg Ngale Health Area					mg Lisala Health Zone
as_list	mg Boso Matindoa Health Area	mg Boso Matindoa Health Area					mg Lisala Health Zone
as_list	mg Pembe Health Area	mg Pembe Health Area					mg Lolo Health Zone
as_list	mg Monday Health Area	mg Monday Health Area					mg Lolo Health Zone
as_list	mg Yewulu Health Area	mg Yewulu Health Area					mg Lolo Health Zone
as_list	mg Yandombo Health Area	mg Yandombo Health Area					mg Lolo Health Zone
as_list	mg Yasinga Health Area	mg Yasinga Health Area					mg Lolo Health Zone
as_list	mg Bokombe Health Area	mg Bokombe Health Area					mg Lolo Health Zone
as_list	mg Bomenge Health Area	mg Bomenge Health Area					mg Lolo Health Zone
as_list	mg Yangbondu Health Area	mg Yangbondu Health Area					mg Yambuku Health Zone
as_list	mg Bauma Health Area	mg Bauma Health Area					mg Yambuku Health Zone
as_list	mg Bondunga Health Area	mg Bondunga Health Area					mg Yambuku Health Zone
as_list	mg Likau Health Area	mg Likau Health Area					mg Yambuku Health Zone
as_list	mg Yamboni Health Area	mg Yamboni Health Area					mg Yambuku Health Zone
as_list	mg Bozogi Health Area	mg Bozogi Health Area					mg Yambuku Health Zone
as_list	mg Yamooko Health Area	mg Yamooko Health Area					mg Yambuku Health Zone
as_list	mg Tshimbi Health Area	mg Tshimbi Health Area					mg Yambuku Health Zone
as_list	mg Yanzumba Health Area	mg Yanzumba Health Area					mg Yambuku Health Zone
as_list	mg Yalombo Swa Health Area	mg Yalombo Swa Health Area					mg Yambuku Health Zone
as_list	mg Yamamba Health Area	mg Yamamba Health Area					mg Yambuku Health Zone
as_list	mn Kangela Health Area	mn Kangela Health Area					mn Kalima Health Zone
as_list	mn Isongo Health Area	mn Isongo Health Area					mn Kalima Health Zone
as_list	mn Kakutya 3 Health Area	mn Kakutya 3 Health Area					mn Kalima Health Zone
as_list	mn Misoke Health Area	mn Misoke Health Area					mn Kalima Health Zone
as_list	mn Kagelya Health Area	mn Kagelya Health Area					mn Kalima Health Zone
as_list	Mukombe Health Area	Mukombe Health Area					mn Kalima Health Zone
as_list	mn Kakaleka Health Area	mn Kakaleka Health Area					mn Kalima Health Zone
as_list	mn Butumba Health Area	mn Butumba Health Area					mn Kampene Health Zone
as_list	mn Lutakasha Health Area	mn Lutakasha Health Area					mn Kasongo Health Zone
as_list	mn Kisesa Health Area	mn Kisesa Health Area					mn Kasongo Health Zone
as_list	mn Kafyoto Health Area	mn Kafyoto Health Area					mn Kasongo Health Zone
as_list	Kankumba Health Area	Kankumba Health Area					mn Kasongo Health Zone
as_list	mn Lububula Health Area	mn Lububula Health Area					mn Kasongo Health Zone
as_list	mn Mufala Health Area	mn Mufala Health Area					mn Kasongo Health Zone
as_list	mn Kongolo Health Area	mn Kongolo Health Area					mn Kasongo Health Zone
as_list	mn Mikelenge Health Area	mn Mikelenge Health Area					Kindu Health Zone
as_list	mn Rva Health Area	mn Rva Health Area					Kindu Health Zone
as_list	mn Kasuku 2 Health Area	mn Kasuku 2 Health Area					Kindu Health Zone
as_list	mn Tokolote Health Area	mn Tokolote Health Area					Kindu Health Zone
as_list	mn Basoko Health Area	mn Basoko Health Area					Kindu Health Zone
as_list	mn Brazza Health Area	mn Brazza Health Area					Kindu Health Zone
as_list	mn Lumbulumbu Health Area	mn Lumbulumbu Health Area					Kindu Health Zone
as_list	mn Karomo Health Area	mn Karomo Health Area					mn Kunda Health Zone
as_list	mn Kimwanga Health Area	mn Kimwanga Health Area					mn Kunda Health Zone
as_list	Kapuli Health Area	Kapuli Health Area					mn Kunda Health Zone
as_list	mn Bikenge Health Area	mn Bikenge Health Area					mn Kunda Health Zone
as_list	mn Kamumba Health Area	mn Kamumba Health Area					mn Kunda Health Zone
as_list	mn Kunda Health Area	mn Kunda Health Area					mn Kunda Health Zone
as_list	mn Amba Health Area	mn Amba Health Area					mn Kunda Health Zone
as_list	Kisandji Health Area	Kisandji Health Area					mn Kunda Health Zone
as_list	mn Kabumbu Health Area	mn Kabumbu Health Area					mn Kunda Health Zone
as_list	mn Penenyingi Health Area	mn Penenyingi Health Area					Lusangi Health Zone
as_list	mn Mabanda Health Area	mn Mabanda Health Area					Lusangi Health Zone
as_list	mn Kasesa Health Area	mn Kasesa Health Area					Lusangi Health Zone
as_list	mn Kagulu Health Area	mn Kagulu Health Area					Lusangi Health Zone
as_list	mn Katimba Health Area	mn Katimba Health Area					Lusangi Health Zone
as_list	mn Tengetenge Health Area	mn Tengetenge Health Area					Lusangi Health Zone
as_list	mn Mukwanga Health Area	mn Mukwanga Health Area					Lusangi Health Zone
as_list	mn Punia 2 Health Area	mn Punia 2 Health Area					mn Punia Health Zone
as_list	mn Mpiala Health Area	mn Mpiala Health Area					mn Punia Health Zone
as_list	mn Kabongola Health Area	mn Kabongola Health Area					mn Punia Health Zone
as_list	mn Kibwana Health Area	mn Kibwana Health Area					mn Punia Health Zone
as_list	mn Matumba Health Area	mn Matumba Health Area					mn Punia Health Zone
as_list	mn Kamukingi Health Area	mn Kamukingi Health Area					mn Punia Health Zone
as_list	mn Kibeleketa Health Area	mn Kibeleketa Health Area					mn Punia Health Zone
as_list	nk Kaseghe CBCA Health Area	nk Kaseghe CBCA Health Area					nk Alimbongo Health Zone
as_list	nk Luseke Health Area	nk Luseke Health Area					nk Alimbongo Health Zone
as_list	nk Taliha Health Area	nk Taliha Health Area					nk Alimbongo Health Zone
as_list	nk Caritas Kaseghe Health Area	nk Caritas Kaseghe Health Area					nk Alimbongo Health Zone
as_list	nk Lubango Health Area	nk Lubango Health Area					nk Alimbongo Health Zone
as_list	nk Bingi Health Area	nk Bingi Health Area					nk Alimbongo Health Zone
as_list	nk Kalimba Health Area	nk Kalimba Health Area					nk Alimbongo Health Zone
as_list	nk Mama Musayi Health Area	nk Mama Musayi Health Area					nk Butembo Health Zone
as_list	nk Vutike Health Area	nk Vutike Health Area					nk Butembo Health Zone
as_list	nk Kyangike Health Area	nk Kyangike Health Area					nk Butembo Health Zone
as_list	nk Matanda Health Area	nk Matanda Health Area					nk Butembo Health Zone
as_list	nk Vulamba Health Area	nk Vulamba Health Area					nk Butembo Health Zone
as_list	nk Vutsundo Health Area	nk Vutsundo Health Area					nk Butembo Health Zone
as_list	nk Munzambaye Health Area	nk Munzambaye Health Area					nk Butembo Health Zone
as_list	nk ASRAMES CDR	nk ASRAMES CDR					nk Goma Health Zone
as_list	nk Himbi Health Area	nk Himbi Health Area					nk Goma Health Zone
as_list	nk Carmel Health Area	nk Carmel Health Area					nk Goma Health Zone
as_list	nk CCLK Health Area	nk CCLK Health Area					nk Goma Health Zone
as_list	nk Mapendo Health Area	nk Mapendo Health Area					nk Goma Health Zone
as_list	nk Heal Africa Health Area	nk Heal Africa Health Area					nk Goma Health Zone
as_list	nk Katindo Health Area	nk Katindo Health Area					nk Goma Health Zone
as_list	nk Kamandi Health Area	nk Kamandi Health Area					nk Kayna Health Zone
as_list	nk Bulotwa Health Area	nk Bulotwa Health Area					nk Kayna Health Zone
as_list	nk Singamwambe Health Area	nk Singamwambe Health Area					nk Kayna Health Zone
as_list	nk Kikuvo Health Area	nk Kikuvo Health Area					nk Kayna Health Zone
as_list	nk Nyamiindo Health Area	nk Nyamiindo Health Area					nk Kayna Health Zone
as_list	nk Butsiri Health Area	nk Butsiri Health Area					nk Kayna Health Zone
as_list	nk Bulinda Health Area	nk Bulinda Health Area					nk Kayna Health Zone
as_list	nk Kanyatsi Health Area	nk Kanyatsi Health Area					nk Kayna Health Zone
as_list	nk Kyalumba Health Area	nk Kyalumba Health Area					nk Kyondo Health Zone
as_list	nk Kivuwe Health Area	nk Kivuwe Health Area					nk Kyondo Health Zone
as_list	nk Kirindera Health Area	nk Kirindera Health Area					nk Kyondo Health Zone
as_list	nk Ngitse Health Area	nk Ngitse Health Area					nk Kyondo Health Zone
as_list	nk Kyangendi Health Area	nk Kyangendi Health Area					nk Kyondo Health Zone
as_list	nk Vulambayiri Health Area	nk Vulambayiri Health Area					nk Kyondo Health Zone
as_list	nk Kyondo Health Area	nk Kyondo Health Area					nk Kyondo Health Zone
as_list	nk Vyakuno Health Area	nk Vyakuno Health Area					nk Kyondo Health Zone
as_list	nk Kirundu Health Area	nk Kirundu Health Area					nk Walikale Health Zone
as_list	nk 8th CEPAC Health Area	nk 8th CEPAC Health Area					nk Walikale Health Zone
as_list	nk Mpofi Health Area	nk Mpofi Health Area					nk Walikale Health Zone
as_list	nk Ndjingala Health Area	nk Ndjingala Health Area					nk Walikale Health Zone
as_list	nk Obaye Health Area	nk Obaye Health Area					nk Walikale Health Zone
as_list	nk Bisie Health Area	nk Bisie Health Area					nk Walikale Health Zone
as_list	nk Biruwe Health Area	nk Biruwe Health Area					nk Walikale Health Zone
as_list	Baraga Health Area	Baraga Health Area					Nude Bili Health Zone
as_list	Nu Duguru Health Area	Nu Duguru Health Area					Nude Bili Health Zone
as_list	Baya Health Area	Baya Health Area					Nude Bili Health Zone
as_list	Boduna Health Area	Boduna Health Area					Nude Bili Health Zone
as_list	Mongoro Health Area	Mongoro Health Area					Nude Bili Health Zone
as_list	nu Gbangi Health Area	nu Gbangi Health Area					Nude Bili Health Zone
as_list	Boroto Health Area	Boroto Health Area					Nude Bili Health Zone
as_list	Nu Kelo Health Area	Nu Kelo Health Area					Bosobolo Health Zone
as_list	Bokada Pombo Health Area	Bokada Pombo Health Area					Bosobolo Health Zone
as_list	Mongo Mono Health Area	Mongo Mono Health Area					Bosobolo Health Zone
as_list	Bosolindo 2 Health Area	Bosolindo 2 Health Area					Bosobolo Health Zone
as_list	Bubanda Health Area	Bubanda Health Area					Bosobolo Health Zone
as_list	Naked, handsome, health area	Naked, handsome, health area					Bosobolo Health Zone
as_list	Nude Lumbo Health Area	Nude Lumbo Health Area					Bosobolo Health Zone
as_list	nu Bongboan Health Area	nu Bongboan Health Area					Businga Health Zone
as_list	Nude Bobiti Health Area	Nude Bobiti Health Area					Businga Health Zone
as_list	Nude City 2 Health Area	Nude City 2 Health Area					Businga Health Zone
as_list	Nude City 1 Health Area	Nude City 1 Health Area					Businga Health Zone
as_list	Edungu Health Area	Edungu Health Area					Businga Health Zone
as_list	Movangusa Health Area	Movangusa Health Area					Businga Health Zone
as_list	nu Songbolo Health Area (Businga)	nu Songbolo Health Area (Businga)					Businga Health Zone
as_list	nu Kawadze Health Area	nu Kawadze Health Area					Gbadolite Health Zone
as_list	Nude Bondeko Health Area	Nude Bondeko Health Area					Gbadolite Health Zone
as_list	Kratos Health Area	Kratos Health Area					Gbadolite Health Zone
as_list	Nu Mangundu Health Area	Nu Mangundu Health Area					Gbadolite Health Zone
as_list	nu Gbado 1 Health Area	nu Gbado 1 Health Area					Gbadolite Health Zone
as_list	nu Nzekele Health Area	nu Nzekele Health Area					Gbadolite Health Zone
as_list	Nude Bolingo Health Area	Nude Bolingo Health Area					Gbadolite Health Zone
as_list	Bonudana Health Area	Bonudana Health Area					Karawa Health Zone
as_list	Nude Karawa Urban Health Area	Nude Karawa Urban Health Area					Karawa Health Zone
as_list	Botulugu Health Area	Botulugu Health Area					Karawa Health Zone
as_list	Bobagalawa Health Area	Bobagalawa Health Area					Karawa Health Zone
as_list	Kanana Health Area	Kanana Health Area					Karawa Health Zone
as_list	nu Kwada Health Area	nu Kwada Health Area					Karawa Health Zone
as_list	Boyabozo Health Area	Boyabozo Health Area					Karawa Health Zone
as_list	Naked Bomago Health Area	Naked Bomago Health Area					Karawa Health Zone
as_list	Boya Health Area	Boya Health Area					Wapinda Health Zone
as_list	nu Wapinda 2 Health Area	nu Wapinda 2 Health Area					Wapinda Health Zone
as_list	nu Ngama Health Area	nu Ngama Health Area					Wapinda Health Zone
as_list	Akpani Health Area	Akpani Health Area					Wapinda Health Zone
as_list	Tongomo Health Area	Tongomo Health Area					Wapinda Health Zone
as_list	Nude Bandi Health Area	Nude Bandi Health Area					Wapinda Health Zone
as_list	nu Vabesu Health Area	nu Vabesu Health Area					Wapinda Health Zone
as_list	sk Muoma Health Area	sk Muoma Health Area					sk Bunyakiri Health Zone
as_list	sk Chabunda Health Area	sk Chabunda Health Area					sk Bunyakiri Health Zone
as_list	sk Kusisa Health Area	sk Kusisa Health Area					sk Bunyakiri Health Zone
as_list	sk Bitale Health Area	sk Bitale Health Area					sk Bunyakiri Health Zone
as_list	sk Tshigoma Health Area	sk Tshigoma Health Area					sk Bunyakiri Health Zone
as_list	sk Irangi Health Area	sk Irangi Health Area					sk Bunyakiri Health Zone
as_list	sk Mangaa Health Area	sk Mangaa Health Area					sk Bunyakiri Health Zone
as_list	sk Mianda Health Area	sk Mianda Health Area					sk Bunyakiri Health Zone
as_list	sk Muhungu Diocesan Health Area	sk Muhungu Diocesan Health Area					Ibanda Health Zone
as_list	sk Cidasa Health Area	sk Cidasa Health Area					Ibanda Health Zone
as_list	sk Ceca40 Nguba Health Area	sk Ceca40 Nguba Health Area					Ibanda Health Zone
as_list	sk Panzi Health Area	sk Panzi Health Area					Ibanda Health Zone
as_list	Ibanda Health Area	Ibanda Health Area					Ibanda Health Zone
as_list	sk Nyawera Health Area	sk Nyawera Health Area					Ibanda Health Zone
as_list	sk Kabuye Health Area	sk Kabuye Health Area					Ibanda Health Zone
as_list	sk Shayo Health Area	sk Shayo Health Area					sk Idjwi Health Zone
as_list	sk Camahiri Health Area	sk Camahiri Health Area					sk Idjwi Health Zone
as_list	sk Misimbwe Health Area	sk Misimbwe Health Area					sk Idjwi Health Zone
as_list	sk Bushusha Health Area	sk Bushusha Health Area					sk Idjwi Health Zone
as_list	sk Mugote Health Area	sk Mugote Health Area					sk Idjwi Health Zone
as_list	sk Bulegeyi Health Area	sk Bulegeyi Health Area					sk Idjwi Health Zone
as_list	sk Mafula Health Area	sk Mafula Health Area					sk Idjwi Health Zone
as_list	sk Mbobero Health Area	sk Mbobero Health Area					sk Kabare Health Zone
as_list	sk Cirunga Health Area	sk Cirunga Health Area					sk Kabare Health Zone
as_list	sk Kalulu Health Area	sk Kalulu Health Area					sk Kabare Health Zone
as_list	sk Bugobe Health Area	sk Bugobe Health Area					sk Kabare Health Zone
as_list	sk Mulege Health Area	sk Mulege Health Area					sk Kabare Health Zone
as_list	sk Mbiza Health Area	sk Mbiza Health Area					sk Kabare Health Zone
as_list	sk Bwirembe Health Area	sk Bwirembe Health Area					sk Kabare Health Zone
as_list	sk Tchofi Health Area	sk Tchofi Health Area					sk Kalehe Health Zone
as_list	sk Mweha Health Area	sk Mweha Health Area					sk Kalehe Health Zone
as_list	sk Bushushu Health Area	sk Bushushu Health Area					sk Kalehe Health Zone
as_list	Bujuki Health Area	Bujuki Health Area					sk Kalehe Health Zone
as_list	sk Kalehe Health Area	sk Kalehe Health Area					sk Kalehe Health Zone
as_list	sk Luzira Health Area	sk Luzira Health Area					sk Kalehe Health Zone
as_list	sk Lushebere Health Area	sk Lushebere Health Area					sk Kalehe Health Zone
as_list	sk Kabamba Health Area	sk Kabamba Health Area					sk Katana Health Zone
as_list	sk Lugendo Health Area	sk Lugendo Health Area					sk Katana Health Zone
as_list	sk Izimero Health Area	sk Izimero Health Area					sk Katana Health Zone
as_list	sk Iko Health Area	sk Iko Health Area					sk Katana Health Zone
as_list	sk Mugeri Health Area	sk Mugeri Health Area					sk Katana Health Zone
as_list	sk Kadjucu Health Area	sk Kadjucu Health Area					sk Katana Health Zone
as_list	sk Ishungu Katana Health Area	sk Ishungu Katana Health Area					sk Katana Health Zone
as_list	sn Djuwola Health Area	sn Djuwola Health Area					sn Dikungu Health Zone
as_list	sn Ovungu Health Area	sn Ovungu Health Area					sn Dikungu Health Zone
as_list	sn Menyasungu Health Area	sn Menyasungu Health Area					sn Dikungu Health Zone
as_list	sn Omeonga Health Area	sn Omeonga Health Area					sn Dikungu Health Zone
as_list	sn Lohata Health Area	sn Lohata Health Area					sn Dikungu Health Zone
as_list	sn Tese Health Area	sn Tese Health Area					sn Dikungu Health Zone
as_list	sn Ohambe Health Area	sn Ohambe Health Area					sn Dikungu Health Zone
as_list	sn Kalemie Health Area	sn Kalemie Health Area					sn Lodja Health Zone
as_list	sn Londa Health Area	sn Londa Health Area					sn Lodja Health Zone
as_list	sn Edingo Health Area	sn Edingo Health Area					sn Lodja Health Zone
as_list	sn Shapembe Health Area	sn Shapembe Health Area					sn Lodja Health Zone
as_list	sn Okitalohonga Health Area	sn Okitalohonga Health Area					sn Lodja Health Zone
as_list	sn Diengenga Health Area	sn Diengenga Health Area					sn Lodja Health Zone
as_list	sn Alengo Health Area	sn Alengo Health Area					sn Lodja Health Zone
as_list	sn Basubuke Health Area	sn Basubuke Health Area					sn Minga Health Zone
as_list	sn Kitenge 1 Health Area	sn Kitenge 1 Health Area					sn Minga Health Zone
as_list	sn Ohale Health Area	sn Ohale Health Area					sn Minga Health Zone
as_list	sn Ehonga Health Area	sn Ehonga Health Area					sn Minga Health Zone
as_list	sn Mbale Health Area	sn Mbale Health Area					sn Minga Health Zone
as_list	sn Eyaka Health Area	sn Eyaka Health Area					sn Minga Health Zone
as_list	sn Mingala Health Area	sn Mingala Health Area					sn Minga Health Zone
as_list	sn Akedi Health Area	sn Akedi Health Area					sn Omendjadi Health Zone
as_list	sn Wema Health Area	sn Wema Health Area					sn Omendjadi Health Zone
as_list	sn Omendjadi Health Area	sn Omendjadi Health Area					sn Omendjadi Health Zone
as_list	sn Konde Health Area	sn Konde Health Area					sn Omendjadi Health Zone
as_list	sn Ohomahoma Health Area	sn Ohomahoma Health Area					sn Omendjadi Health Zone
as_list	sn Dowo 2 Health Area	sn Dowo 2 Health Area					sn Omendjadi Health Zone
as_list	sn Longanga Health Area	sn Longanga Health Area					sn Omendjadi Health Zone
as_list	Okakonyombe Health Area	Okakonyombe Health Area					sn Ototo Health Zone
as_list	sn Tshodi Health Area	sn Tshodi Health Area					sn Ototo Health Zone
as_list	sn Dolo Health Area	sn Dolo Health Area					sn Ototo Health Zone
as_list	sn Ngomolodi Health Area	sn Ngomolodi Health Area					sn Ototo Health Zone
as_list	sn Mbaka Health Area	sn Mbaka Health Area					sn Ototo Health Zone
as_list	sn Kongo Health Area	sn Kongo Health Area					sn Ototo Health Zone
as_list	Onema Ototo Health Area	Onema Ototo Health Area					sn Ototo Health Zone
as_list	sn Yanga Health Area	sn Yanga Health Area					sn Tshumbe Health Zone
as_list	sn Ndjovu Lokale Health Area	sn Ndjovu Lokale Health Area					sn Tshumbe Health Zone
as_list	Oshingoto Health Area	Oshingoto Health Area					sn Tshumbe Health Zone
as_list	sn Tshumbe2 Health Area	sn Tshumbe2 Health Area					sn Tshumbe Health Zone
as_list	sn Kalema Health Area	sn Kalema Health Area					sn Tshumbe Health Zone
as_list	sn Dikwadjondo Health Area	sn Dikwadjondo Health Area					sn Tshumbe Health Zone
as_list	su Bobangala Health Area	su Bobangala Health Area					su Bogosenubea Health Zone
as_list	su Bogose Konu Health Area	su Bogose Konu Health Area					su Bogosenubea Health Zone
as_list	su Bobasonga Health Area	su Bobasonga Health Area					su Bogosenubea Health Zone
as_list	su Boyawaza Health Area	su Boyawaza Health Area					su Bogosenubea Health Zone
as_list	su Ngbonge Health Area	su Ngbonge Health Area					su Bogosenubea Health Zone
as_list	su Boyamalanga Health Area	su Boyamalanga Health Area					su Bogosenubea Health Zone
as_list	su Bodetoa Health Area	su Bodetoa Health Area					su Bogosenubea Health Zone
as_list	su Bobisi Health Area	su Bobisi Health Area					su Bwamanda Health Zone
as_list	su Bozoko 5 Health Area	su Bozoko 5 Health Area					su Bwamanda Health Zone
as_list	su Mbari Health Area	su Mbari Health Area					su Bwamanda Health Zone
as_list	su Bowakara Health Area	su Bowakara Health Area					su Bwamanda Health Zone
as_list	su Bominenge Kada Health Area	su Bominenge Kada Health Area					su Bwamanda Health Zone
as_list	su Bokembe Health Area	su Bokembe Health Area					su Bwamanda Health Zone
as_list	su Bodigina Health Area	su Bodigina Health Area					su Bwamanda Health Zone
as_list	Mount Gila Health Area	Mount Gila Health Area					Gemena Health Zone
as_list	Kivu City Health Area	Kivu City Health Area					Gemena Health Zone
as_list	su Boyademele Health Area	su Boyademele Health Area					Gemena Health Zone
as_list	su Nguwenge Health Area	su Nguwenge Health Area					Gemena Health Zone
as_list	Gemena 3 Health Area	Gemena 3 Health Area					Gemena Health Zone
as_list	su Bokuda Health Area	su Bokuda Health Area					Gemena Health Zone
as_list	su Zekefia Health Area	su Zekefia Health Area					Gemena Health Zone
as_list	su Bodigia Moke Health Area	su Bodigia Moke Health Area					Gemena Health Zone
as_list	su Bozagba 25 Health Area	su Bozagba 25 Health Area					Gemena Health Zone
as_list	su Boso Mbubu Health Area	su Boso Mbubu Health Area					Kungu Health Zone
as_list	Bogba Health Area	Bogba Health Area					Kungu Health Zone
as_list	su Bobey Health Area	su Bobey Health Area					Kungu Health Zone
as_list	su Limpoko Health Area	su Limpoko Health Area					Kungu Health Zone
as_list	Bomboma Health Area	Bomboma Health Area					Kungu Health Zone
as_list	Bomenge Health Area	Bomenge Health Area					Kungu Health Zone
as_list	su Ngele Health Area	su Ngele Health Area					Kungu Health Zone
as_list	su Libobi Health Area	su Libobi Health Area					Kungu Health Zone
as_list	su Gulukolo Health Area	su Gulukolo Health Area					Kungu Health Zone
as_list	su Mbele Health Area	su Mbele Health Area					su Mbaya Health Zone
as_list	su Ngwambele Health Area	su Ngwambele Health Area					su Mbaya Health Zone
as_list	Kangalanga Health Area	Kangalanga Health Area					su Mbaya Health Zone
as_list	su Gwi Health Area	su Gwi Health Area					su Mbaya Health Zone
as_list	Kpokoro Health Area	Kpokoro Health Area					su Mbaya Health Zone
as_list	su Mbaya Health Area	su Mbaya Health Area					su Mbaya Health Zone
as_list	su Wozo 2 Health Area	su Wozo 2 Health Area					su Mbaya Health Zone
as_list	su Bondama Health Area	su Bondama Health Area					su Tandala Health Zone
as_list	Bogbena Health Area	Bogbena Health Area					su Tandala Health Zone
as_list	su Boliebu Health Area	su Boliebu Health Area					su Tandala Health Zone
as_list	su Bogoro Health Area	su Bogoro Health Area					su Tandala Health Zone
as_list	su Bongbia Tandala Health Area	su Bongbia Tandala Health Area					su Tandala Health Zone
as_list	su Bozombali Health Area	su Bozombali Health Area					su Tandala Health Zone
as_list	su Bomawi Health Area	su Bomawi Health Area					su Tandala Health Zone
as_list	su Bombakabo Health Area	su Bombakabo Health Area					su Tandala Health Zone
as_list	su Bodanganea Health Area	su Bodanganea Health Area					su Tandala Health Zone
as_list	Kitanda Health Area	Kitanda Health Area					Ankoro Health Zone
as_list	tn Kimungu Health Area	tn Kimungu Health Area					Ankoro Health Zone
as_list	Kiluba Health Area	Kiluba Health Area					Ankoro Health Zone
as_list	tn Kalole Health Area	tn Kalole Health Area					Ankoro Health Zone
as_list	Kilembwe Health Area	Kilembwe Health Area					Ankoro Health Zone
as_list	Kayombo Health Area	Kayombo Health Area					Ankoro Health Zone
as_list	tn Kambi Health Area	tn Kambi Health Area					Ankoro Health Zone
as_list	tn Kibao Health Area	tn Kibao Health Area					Ankoro Health Zone
as_list	tn Ngwena Gare Health Area	tn Ngwena Gare Health Area					Kabalo Health Zone
as_list	tn Mulimi Health Area	tn Mulimi Health Area					Kabalo Health Zone
as_list	Kihanga Health Area	Kihanga Health Area					Kabalo Health Zone
as_list	tn Pofu Health Area	tn Pofu Health Area					Kabalo Health Zone
as_list	tn Kadima Health Area	tn Kadima Health Area					Kabalo Health Zone
as_list	Kaongo Health Area	Kaongo Health Area					Kabalo Health Zone
as_list	tn Kasinge Health Area	tn Kasinge Health Area					Kabalo Health Zone
as_list	tn Kalenge Health Area	tn Kalenge Health Area					Kabalo Health Zone
as_list	tn Martin Ville Health Area	tn Martin Ville Health Area					Kalemie Health Zone
as_list	tn Lwanika Health Area	tn Lwanika Health Area					Kalemie Health Zone
as_list	tn Clinic Health Area	tn Clinic Health Area					Kalemie Health Zone
as_list	tn Kambu Health Area	tn Kambu Health Area					Kalemie Health Zone
as_list	tn Mayi Baridi Health Area	tn Mayi Baridi Health Area					Kalemie Health Zone
as_list	tn Kawama Health Area	tn Kawama Health Area					Kalemie Health Zone
as_list	tn Hewa Bora Health Area	tn Hewa Bora Health Area					Kalemie Health Zone
as_list	Mutakuya Health Area	Mutakuya Health Area					Kalemie Health Zone
as_list	Kiambi Health Area	Kiambi Health Area					Kiambi Health Zone
as_list	tn Kabeke Health Area	tn Kabeke Health Area					Kiambi Health Zone
as_list	Kahongo Health Area	Kahongo Health Area					Kiambi Health Zone
as_list	tn Soswa Health Area	tn Soswa Health Area					Kiambi Health Zone
as_list	tn Muzovoy Health Area	tn Muzovoy Health Area					Kiambi Health Zone
as_list	tn Lenge Health Area	tn Lenge Health Area					Kiambi Health Zone
as_list	tn Mpiana Health Area	tn Mpiana Health Area					Kiambi Health Zone
as_list	Kabonzo Health Area	Kabonzo Health Area					Kiambi Health Zone
as_list	tn Katea Health Area	tn Katea Health Area					tn Kongolo Health Zone
as_list	tn Matenta Health Area	tn Matenta Health Area					tn Kongolo Health Zone
as_list	tn Kandolo Health Area	tn Kandolo Health Area					tn Kongolo Health Zone
as_list	tn Kasheke Health Area	tn Kasheke Health Area					tn Kongolo Health Zone
as_list	Kilembi Health Area	Kilembi Health Area					tn Kongolo Health Zone
as_list	Mutakuya Health Area 1	Mutakuya Health Area 1					tn Kongolo Health Zone
as_list	Mankoto Health Area	Mankoto Health Area					tn Kongolo Health Zone
as_list	tn City Health Area	tn City Health Area					tn Kongolo Health Zone
as_list	tn Kateba Health Area	tn Kateba Health Area					tn Mbulula Health Zone
as_list	Kilenge Health Area	Kilenge Health Area					tn Mbulula Health Zone
as_list	tn Mwana Ngoy Health Area	tn Mwana Ngoy Health Area					tn Mbulula Health Zone
as_list	tn Ponda Health Area	tn Ponda Health Area					tn Mbulula Health Zone
as_list	tn Yenga Health Area	tn Yenga Health Area					tn Mbulula Health Zone
as_list	Makutano Health Area	Makutano Health Area					tn Mbulula Health Zone
as_list	Kabundi Health Area	Kabundi Health Area					tn Mbulula Health Zone
as_list	Bongonza Health Area	Bongonza Health Area					Banalia Health Zone
as_list	Lukelo Health Area	Lukelo Health Area					Banalia Health Zone
as_list	Dr. Sharp Health Area	Dr. Sharp Health Area					Banalia Health Zone
as_list	Motoma Health Area	Motoma Health Area					Banalia Health Zone
as_list	St. Elisabeth Health Area	St. Elisabeth Health Area					Banalia Health Zone
as_list	tp Zambeke Health Area	tp Zambeke Health Area					Banalia Health Zone
as_list	Baloma Health Area	Baloma Health Area					Banalia Health Zone
as_list	Yambomba Health Area	Yambomba Health Area					tp Basali Health Zone
as_list	Bunga Health Area	Bunga Health Area					tp Basali Health Zone
as_list	tp Bakere Health Area	tp Bakere Health Area					tp Basali Health Zone
as_list	tp Bombongo Health Area	tp Bombongo Health Area					tp Basali Health Zone
as_list	Bolika Health Area	Bolika Health Area					tp Basali Health Zone
as_list	tp Basali Health Area	tp Basali Health Area					tp Basali Health Zone
as_list	Yangbulu Health Area	Yangbulu Health Area					tp Basali Health Zone
as_list	tp Yesse Health Area	tp Yesse Health Area					Lowa Health Zone
as_list	Kalindula Health Area	Kalindula Health Area					Lowa Health Zone
as_list	Masiri Health Area	Masiri Health Area					Lowa Health Zone
as_list	tp Batiezue Health Area	tp Batiezue Health Area					Lowa Health Zone
as_list	Mayunga Health Area	Mayunga Health Area					Lowa Health Zone
as_list	tp Ongoka Health Area	tp Ongoka Health Area					Lowa Health Zone
as_list	Lokani Health Area	Lokani Health Area					Lowa Health Zone
as_list	tp Confidence Health Area	tp Confidence Health Area					Mangobo Health Zone
as_list	tp Maman Mwilu Health Area	tp Maman Mwilu Health Area					Mangobo Health Zone
as_list	tp Siloe Health Area	tp Siloe Health Area					Mangobo Health Zone
as_list	tp Anoalite Health Area	tp Anoalite Health Area					Mangobo Health Zone
as_list	Salama Health Area	Salama Health Area					Mangobo Health Zone
as_list	Fedi Health Area	Fedi Health Area					Mangobo Health Zone
as_list	tp Bombula Health Area	tp Bombula Health Area					Mangobo Health Zone
as_list	tp Tshopo 1 Health Area	tp Tshopo 1 Health Area					Tshopo Health Zone
as_list	Kumbakisaka Health Area	Kumbakisaka Health Area					Tshopo Health Zone
as_list	tp Lobiko Health Area	tp Lobiko Health Area					Tshopo Health Zone
as_list	Bavatete Health Area	Bavatete Health Area					Tshopo Health Zone
as_list	Massina Health Area	Massina Health Area					Tshopo Health Zone
as_list	tp Tshopo 2 Health Area	tp Tshopo 2 Health Area					Tshopo Health Zone
as_list	tp Pumuzika Health Area	tp Pumuzika Health Area					Tshopo Health Zone
as_list	St Casimir Health Area	St Casimir Health Area					tp Ubundu Health Zone
as_list	Bamanga Health Area	Bamanga Health Area					tp Ubundu Health Zone
as_list	tp Ndjale Health Area	tp Ndjale Health Area					tp Ubundu Health Zone
as_list	Kirundu Health Area	Kirundu Health Area					tp Ubundu Health Zone
as_list	tp Banandjale Health Area	tp Banandjale Health Area					tp Ubundu Health Zone
as_list	tp Ubundu Health Area	tp Ubundu Health Area					tp Ubundu Health Zone
as_list	tp Basua Health Area	tp Basua Health Area					tp Ubundu Health Zone
as_list	tp Batiamoyowa Health Area	tp Batiamoyowa Health Area					tp Ubundu Health Zone
as_list	you Boonia Health Area	you Boonia Health Area					Befale Health Zone
as_list	you Lolengi Health Area	you Lolengi Health Area					Befale Health Zone
as_list	you Lifindo Health Area	you Lifindo Health Area					Befale Health Zone
as_list	You Eat Health Area	You Eat Health Area					Befale Health Zone
as_list	you Lisoko Health Area	you Lisoko Health Area					Befale Health Zone
as_list	tu Bolafa Health Area	tu Bolafa Health Area					Befale Health Zone
as_list	tu Engunda Health Area	tu Engunda Health Area					Befale Health Zone
as_list	tu Boende 2 Kimbangu Health Area	tu Boende 2 Kimbangu Health Area					you Boende Health Zone
as_list	you Iyaliboonde Health Area	you Iyaliboonde Health Area					you Boende Health Zone
as_list	tu Efoku Health Area	tu Efoku Health Area					you Boende Health Zone
as_list	Bokongo Health Area	Bokongo Health Area					you Boende Health Zone
as_list	tu Lokali Health Area	tu Lokali Health Area					you Boende Health Zone
as_list	You Nsonge Health Area	You Nsonge Health Area					you Boende Health Zone
as_list	tu Boende 2 Nsele Health Area	tu Boende 2 Nsele Health Area					you Boende Health Zone
as_list	Lokula Health Area	Lokula Health Area					you Boende Health Zone
as_list	tu Eandja Iyondje Health Area	tu Eandja Iyondje Health Area					you Boende Health Zone
as_list	Bolemba Health Area	Bolemba Health Area					you Boende Health Zone
as_list	Esongo Health Area	Esongo Health Area					Busanga Health Zone
[truncated: 44 more rows]

## Sheet:  settings
form_title	form_id	default_language	instance_name	xml_root	version
ECV_C19_MENAGE_V7	ECV_C19_MENAGE_V7	French			21082024
